# Supplementary material for: Polyphenols from the Peels of Punica granatum L. and Their Bioactivity of Suppressing Lipopolysaccharide-Stimulated Inflammatory Cytokines and Mediators in RAW 264.7 Cells via Activating p38 MAPK and NF-κB Signaling Pathways
Source: MDPI journal article supplement (doi:10.3390/molecules27144622), 2022-07-20
Supplement: s1 [file s1]

# **Polyphenols from the Peels of *Punica granatum* L. and Their Bioactivity of Suppressing Lipopolysaccharide-Stimulated Inflammatory Cytokines and Mediators in RAW 264.7 Cells *via* Activating p38 MAPK and NF- $\kappa$ B Signaling Pathways**

Hui-Min Li <sup>1,†</sup>, Ongher Kouye <sup>1,†</sup>, Ding-Shan Yang <sup>2</sup>, Ya-Qi Zhang <sup>2</sup>, Jing-Ya Ruan <sup>1</sup>, Li-Feng Han <sup>1</sup>, Yi Zhang <sup>1,2,\*</sup>, Tao Wang <sup>1,2,\*</sup>

<sup>1</sup> State Key Laboratory of Component-based Chinese Medicine, Tianjin University of Traditional Chinese Medicine, 10 Poyanghu Road, West Area, Tuanbo New Town, Jinghai District, 301617, Tianjin, China; 15380711687@163.com (H.-M.L.); kouye2022@163.com (O.K.); Ruanjy19930919@163.com (J.-Y.R.); hanlifeng\_1@sohu.com (L.-F.H.);

<sup>2</sup> I Tianjin Key Laboratory of TCM Chemistry and Analysis, Tianjin University of Traditional Chinese Medicine, 10 Poyanghu Road, West Area, Tuanbo New Town, Jinghai District, 301617 Tianjin, China; yangdingshan1996@163.com (D.-S.Z.); Zhangyaq1997@163.com (Y.-Q.Z.);

\* Correspondence: zhwwxzh@tjutcm.edu.cn (Y.Z.); wangtao@tjutcm.edu.cn (T.W.); Tel./Fax: +86-22-5959-6168 (T.W.)

† These authors contributed equally to this manuscript.

|                                                                                                   |    |
|---------------------------------------------------------------------------------------------------|----|
| Figure S1. $^1\text{H}$ NMR (500 MHz, $\text{DMSO-}d_6$ ) spectrum of 1.....                      | 4  |
| Figure S2. $^{13}\text{C}$ NMR (125 MHz, $\text{DMSO-}d_6$ ) spectrum of compound 1.....          | 4  |
| Figure S3. HSQC ( $\text{DMSO-}d_6$ ) spectrum of compound 1.....                                 | 5  |
| Figure S4. HMBC ( $\text{DMSO-}d_6$ ) spectrum of compound 1.....                                 | 5  |
| Figure S5. HRESIMS spectrum of compound 1.....                                                    | 6  |
| Figure S6. $^1\text{H}$ NMR (500 MHz, $\text{DMSO-}d_6$ ) spectrum of compound 2.....             | 7  |
| Figure S7. $^{13}\text{C}$ NMR (125 MHz, $\text{DMSO-}d_6$ ) spectrum of compound 2.....          | 7  |
| Figure S8. DEPT (125 MHz, $\text{DMSO-}d_6$ ) spectrum of compound 2.....                         | 8  |
| Figure S9. HSQC ( $\text{DMSO-}d_6$ ) spectrum of compound 2.....                                 | 8  |
| Figure S10. HMBC ( $\text{DMSO-}d_6$ ) spectrum of compound 2.....                                | 9  |
| Figure S11. HRESIMS spectrum of compound 2.....                                                   | 9  |
| Figure S12. $^1\text{H}$ NMR (500 MHz, $\text{DMSO-}d_6$ ) spectrum of compound 3.....            | 10 |
| Figure S13. $^{13}\text{C}$ NMR (125 MHz, $\text{DMSO-}d_6$ ) spectrum of compound 3.....         | 10 |
| Figure S14. DEPT (125 MHz, $\text{DMSO-}d_6$ ) spectrum of compound 3.....                        | 11 |
| Figure S15. $^1\text{H}$ $^1\text{H}$ COSY ( $\text{DMSO-}d_6$ ) spectrum of compound 3.....      | 11 |
| Figure S16. HSQC ( $\text{DMSO-}d_6$ ) spectrum of compound 3.....                                | 12 |
| Figure S17. HMBC ( $\text{DMSO-}d_6$ ) spectrum of compound 3.....                                | 12 |
| Figure S18. HRESIMS spectrum of compound 3.....                                                   | 13 |
| Figure S19. The experimental ECD spectrum of compound 3 in MeOH.....                              | 13 |
| Figure S20. $^1\text{H}$ NMR (500 MHz, $\text{DMSO-}d_6$ ) spectrum of compound 4.....            | 14 |
| Figure S21. $^{13}\text{C}$ NMR (125 MHz, $\text{DMSO-}d_6$ ) spectrum of compound 4.....         | 14 |
| Figure S22. DEPT (125 MHz, $\text{DMSO-}d_6$ ) spectrum of compound 4.....                        | 15 |
| Figure S23. $^1\text{H}$ $^1\text{H}$ COSY ( $\text{DMSO-}d_6$ ) spectrum of compound 4.....      | 15 |
| Figure S24. HSQC ( $\text{DMSO-}d_6$ ) spectrum of compound 4.....                                | 16 |
| Figure S25. HMBC ( $\text{DMSO-}d_6$ ) spectrum of compound 4.....                                | 16 |
| Figure S26. HRESIMS spectrum of compound 4.....                                                   | 17 |
| Figure S27. The experimental ECD spectrum of compound 4 in MeOH.....                              | 17 |
| Figure S28. $^1\text{H}$ NMR (500 MHz, $\text{DMSO-}d_6$ ) spectrum of compound 5.....            | 18 |
| Figure S29. $^{13}\text{C}$ NMR (125 MHz, $\text{DMSO-}d_6$ ) spectrum of compound 5.....         | 18 |
| Figure S30. DEPT (125 MHz, $\text{DMSO-}d_6$ ) spectrum of compound 5.....                        | 19 |
| Figure S31. $^1\text{H}$ $^1\text{H}$ COSY ( $\text{DMSO-}d_6$ ) spectrum of compound 5.....      | 19 |
| Figure S32. HSQC ( $\text{DMSO-}d_6$ ) spectrum of compound 5.....                                | 20 |
| Figure S33. HMBC ( $\text{DMSO-}d_6$ ) spectrum of compound 5.....                                | 20 |
| Figure S34. HRESIMS spectrum of compound 5.....                                                   | 21 |
| Figure S35. $^1\text{H}$ NMR (500 MHz, $\text{DMSO-}d_6$ ) spectrum of compound 6.....            | 22 |
| Figure S36. $^{13}\text{C}$ NMR (125 MHz, $\text{DMSO-}d_6$ ) spectrum of compound 6.....         | 22 |
| Figure S37. DEPT (125 MHz, $\text{DMSO-}d_6$ ) spectrum of compound 6.....                        | 23 |
| Figure S38. $^1\text{H}$ $^1\text{H}$ COSY ( $\text{DMSO-}d_6$ ) spectrum of compound 6.....      | 23 |
| Figure S39. HSQC ( $\text{DMSO-}d_6$ ) spectrum of compound 6.....                                | 24 |
| Figure S40. HMBC ( $\text{DMSO-}d_6$ ) spectrum of compound 6.....                                | 24 |
| Figure S41. HRESIMS spectrum of compound 6.....                                                   | 25 |
| Figure S42. The experimental ECD spectrum of compound 6 in MeOH.....                              | 25 |
| Figure S43. $^1\text{H}$ NMR (400 MHz, $\text{CD}_3\text{OD}$ ) spectrum of compound 7.....       | 26 |
| Figure S44. $^{13}\text{C}$ NMR (100 MHz, $\text{CD}_3\text{OD}$ ) spectrum of compound 7.....    | 26 |
| Figure S45. DEPT (100 MHz, $\text{CD}_3\text{OD}$ ) spectrum of compound 7.....                   | 27 |
| Figure S46. $^1\text{H}$ $^1\text{H}$ COSY ( $\text{CD}_3\text{OD}$ ) spectrum of compound 7..... | 27 |
| Figure S47. HSQC ( $\text{CD}_3\text{OD}$ ) spectrum of compound 7.....                           | 28 |
| Figure S48. HMBC ( $\text{CD}_3\text{OD}$ ) spectrum of compound 7.....                           | 28 |
| Figure S49. HRESIMS spectrum of compound 7.....                                                   | 29 |
| Figure S50. The experimental ECD spectrum of compound 7 in MeOH.....                              | 29 |

|                                                                                                 |    |
|-------------------------------------------------------------------------------------------------|----|
| Figure S51. <sup>1</sup> H NMR (400 MHz, CD <sub>3</sub> OD) spectrum of compound 8.....        | 30 |
| Figure S52. <sup>13</sup> C NMR (100 MHz, CD <sub>3</sub> OD) spectrum of compound 8.....       | 30 |
| Figure S53. <sup>1</sup> H <sup>1</sup> H COSY (CD <sub>3</sub> OD) spectrum of compound 8..... | 31 |
| Figure S54. HSQC (CD <sub>3</sub> OD) spectrum of compound 8.....                               | 31 |
| Figure S55. HMBC (CD <sub>3</sub> OD) spectrum of compound 8.....                               | 32 |
| Figure S56. HRESIMS spectrum of compound 8.....                                                 | 32 |
| Figure S57. The experimental ECD spectrum of compound 8 in MeOH.....                            | 33 |
| Figure S58. <sup>1</sup> H NMR (500 MHz, CD <sub>3</sub> OD) spectrum of compound 9.....        | 34 |
| Figure S59. <sup>13</sup> C NMR (125 MHz, CD <sub>3</sub> OD) spectrum of compound 9.....       | 34 |
| Figure S60. DEPT (125 MHz, CD <sub>3</sub> OD) spectrum of compound 9.....                      | 35 |
| Figure S61. <sup>1</sup> H <sup>1</sup> H COSY (CD <sub>3</sub> OD) spectrum of compound 9..... | 35 |
| Figure S62. HSQC (CD <sub>3</sub> OD) spectrum of compound 9.....                               | 36 |
| Figure S63. HMBC (CD <sub>3</sub> OD) spectrum of compound 9.....                               | 36 |
| Figure S64. HRESIMS spectrum of compound 9.....                                                 | 37 |
| Figure S65. The LC-MS analysis of compounds 2, 4, 5, 6 and 9 from <i>P. granatum</i> peels..... | 38 |
| Figure S66. The experimental ECD spectrum of compound 14 in MeOH.....                           | 41 |
| Figure S67. The experimental ECD spectrum of compound 16 in MeOH.....                           | 41 |
| Figure S68. The experimental ECD spectrum of compound 17 in MeOH.....                           | 42 |
| Figure S69. The experimental ECD spectrum of compound 18 in MeOH.....                           | 42 |
| Figure S70. The experimental ECD spectrum of compound 19 in MeOH.....                           | 43 |
| Figure S71. The experimental ECD spectrum of compound 20 in MeOH.....                           | 43 |
| Figure S72. The MTT assay of compounds 1–18, 20 at 30 μM and 19 at 20 μM.....                   | 44 |
| Figure S73. The raw data of Figure 4.....                                                       | 45 |
| Physical and chemical data of compounds 10–20.....                                              | 46 |

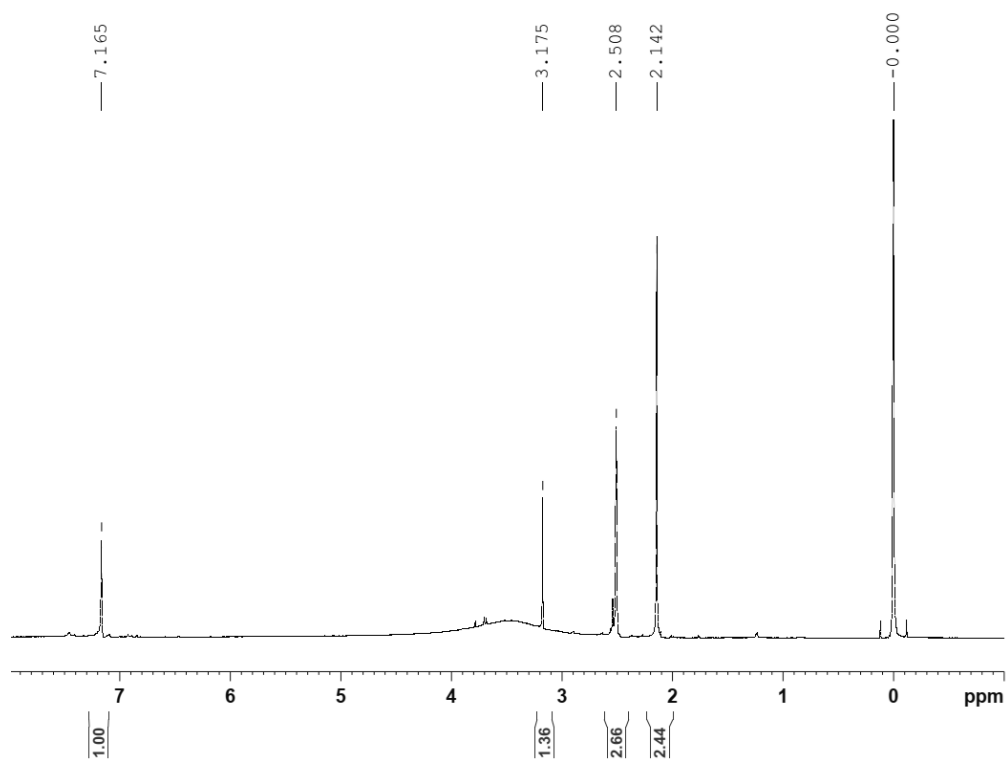

**Figure S1.**  $^1\text{H}$  NMR (500 MHz,  $\text{DMSO}-d_6$ ) spectrum of **1**

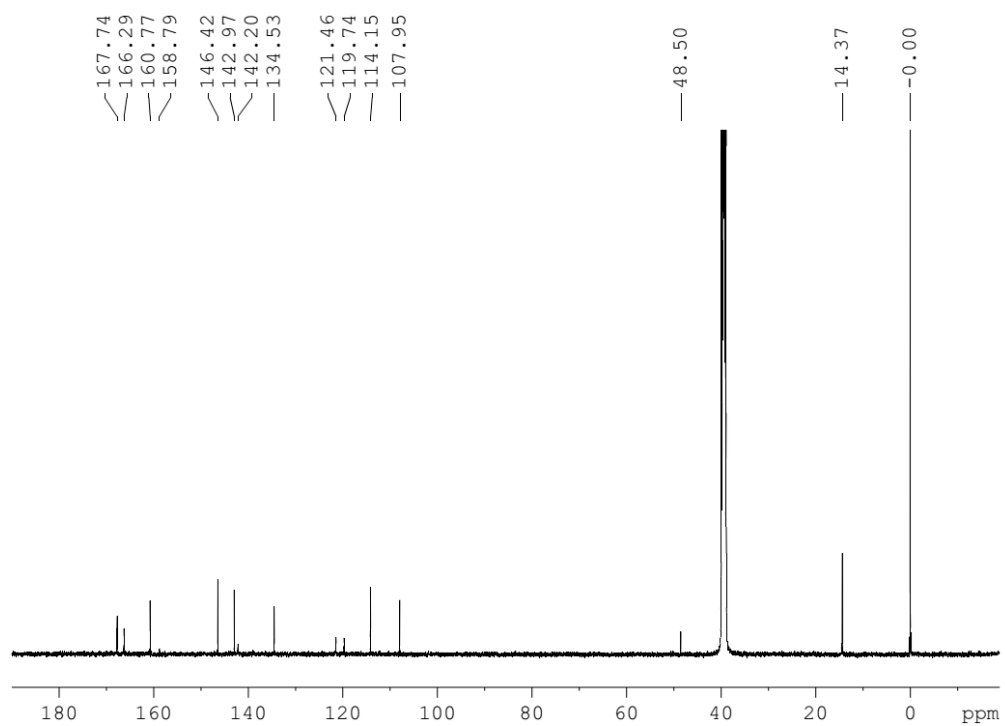

**Figure S2.**  $^{13}\text{C}$  NMR (125 MHz,  $\text{DMSO}-d_6$ ) spectrum of **1**

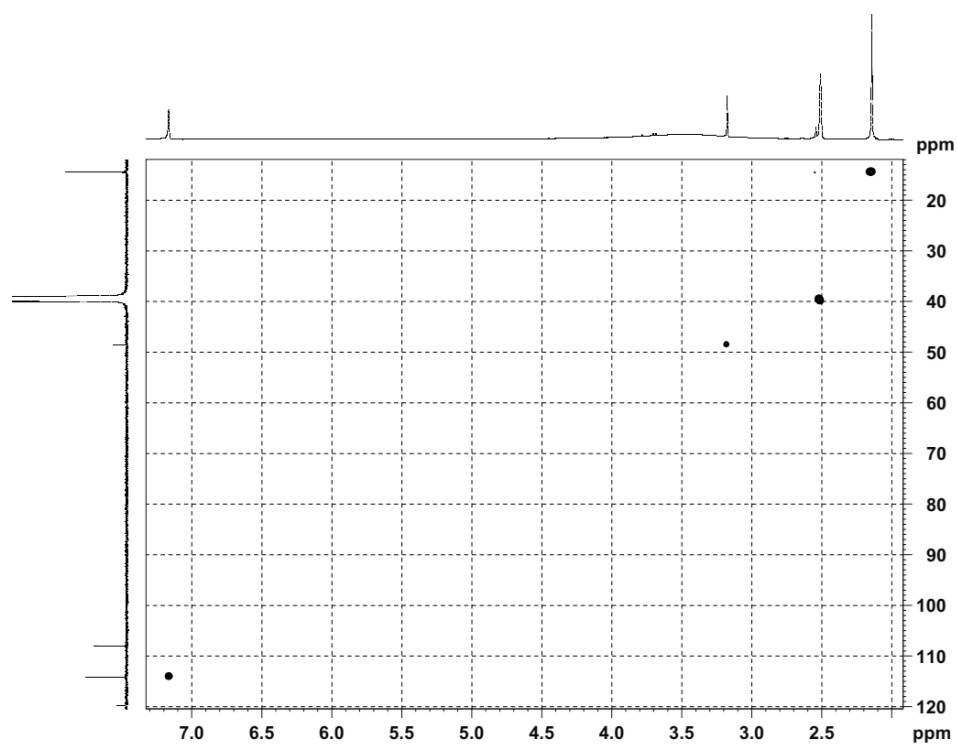

Figure S3. HSQC (DMSO- $d_6$ ) spectrum of **1**

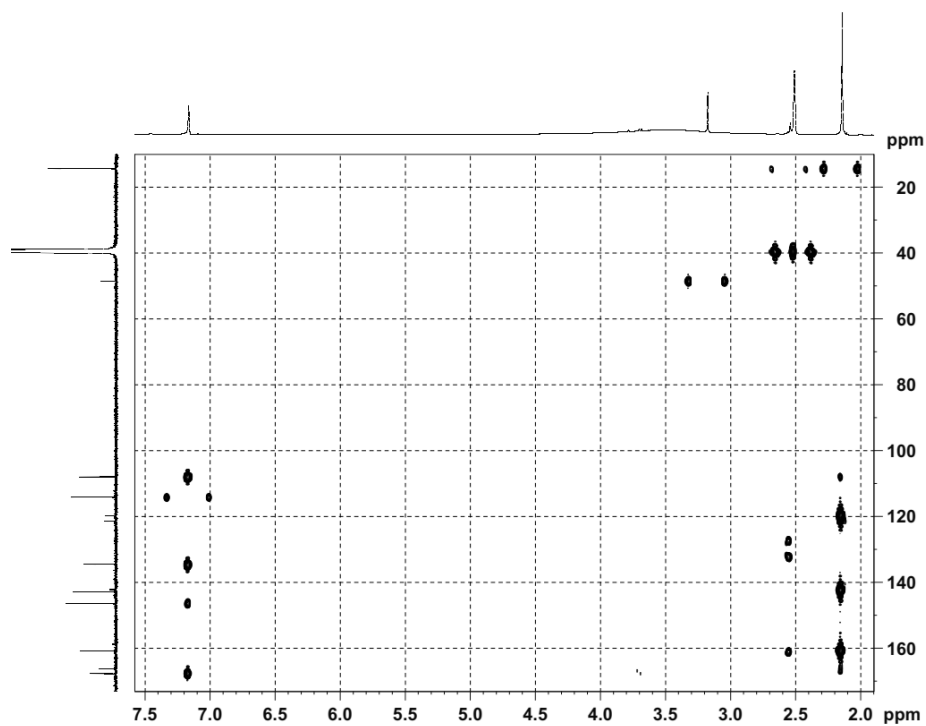

Figure S4. HMBC (DMSO- $d_6$ ) spectrum of **1**

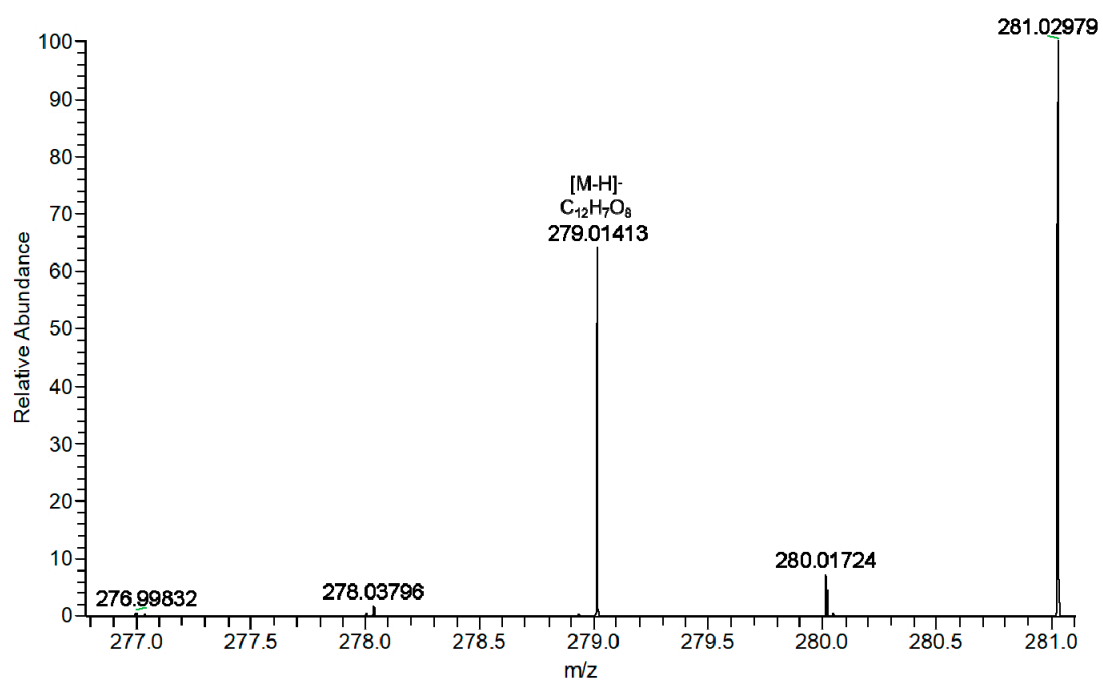

Figure S5. HRESIMS spectrum of **1**

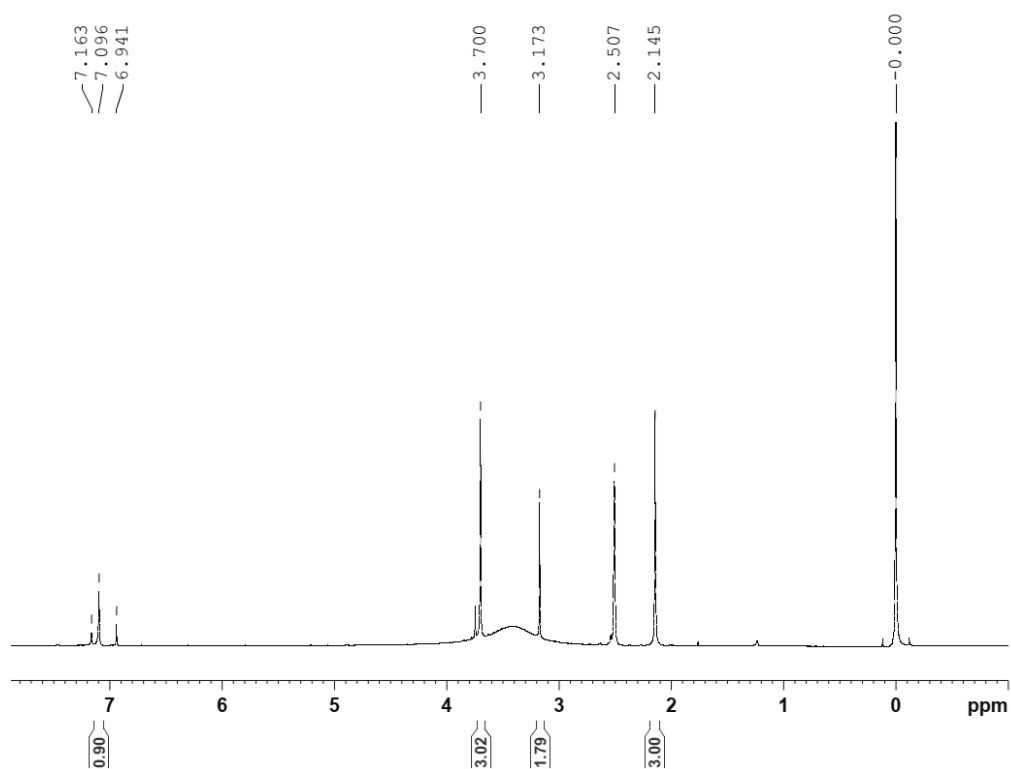

Figure S6. <sup>1</sup>H NMR (500 MHz, DMSO-*d*<sub>6</sub>) spectrum of 2

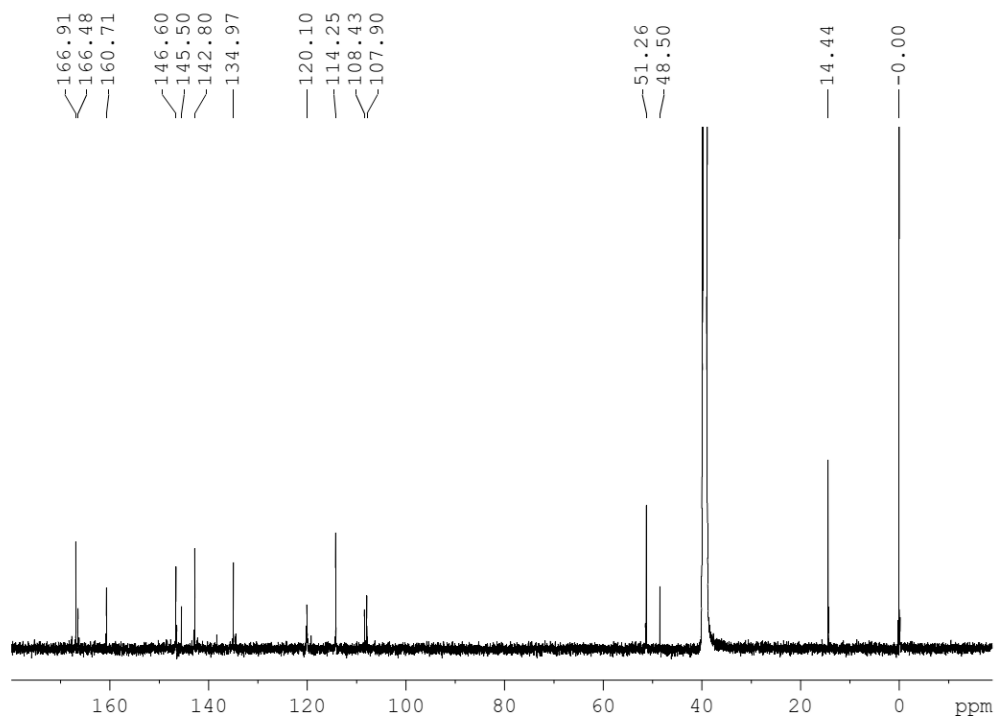

Figure S7. <sup>13</sup>C NMR (125 MHz, DMSO-*d*<sub>6</sub>) spectrum of 2

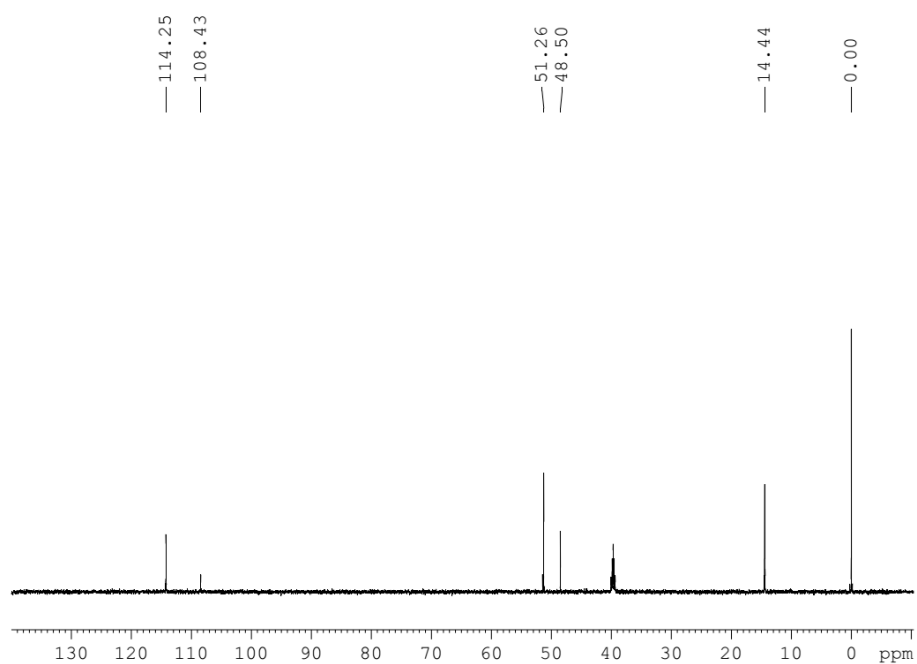

Figure S8. DEPT (125 MHz, DMSO- $d_6$ ) spectrum of 2

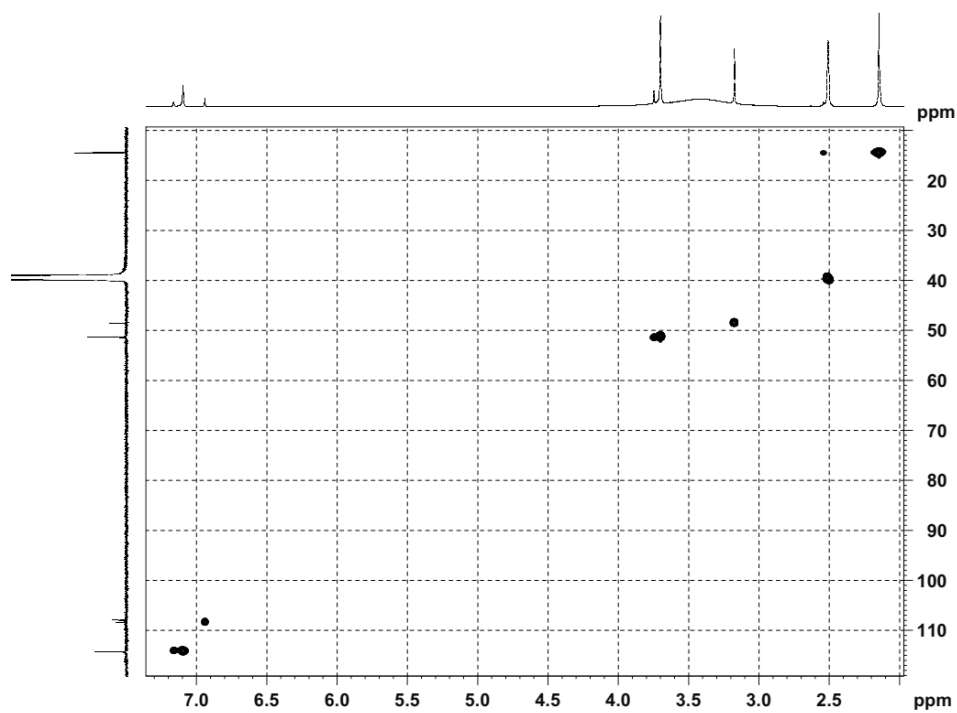

Figure S9. HSQC (DMSO- $d_6$ ) spectrum of 2



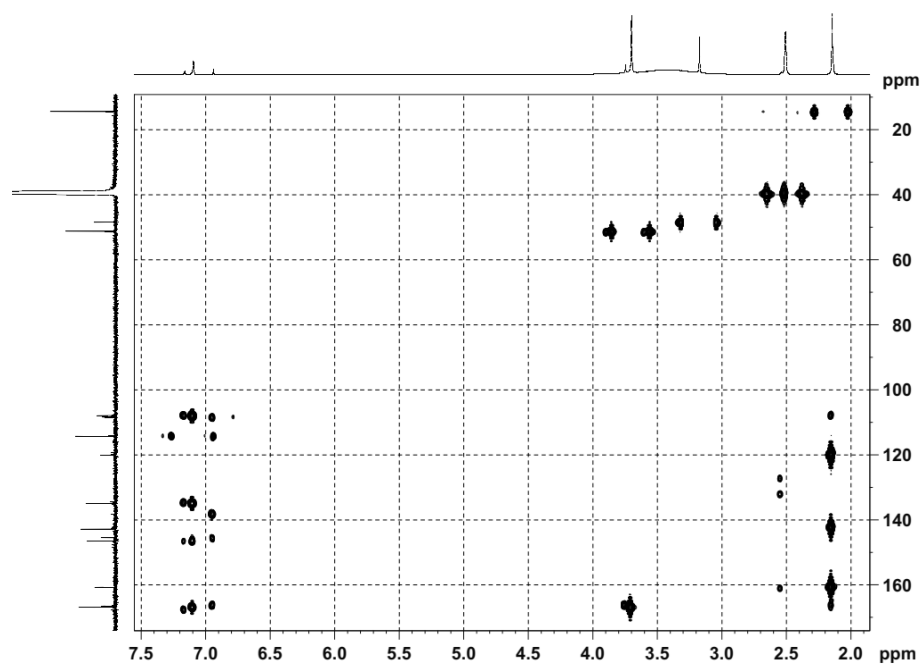

Figure S10. S11 HMBC (DMSO- $d_6$ ) spectrum of **2**

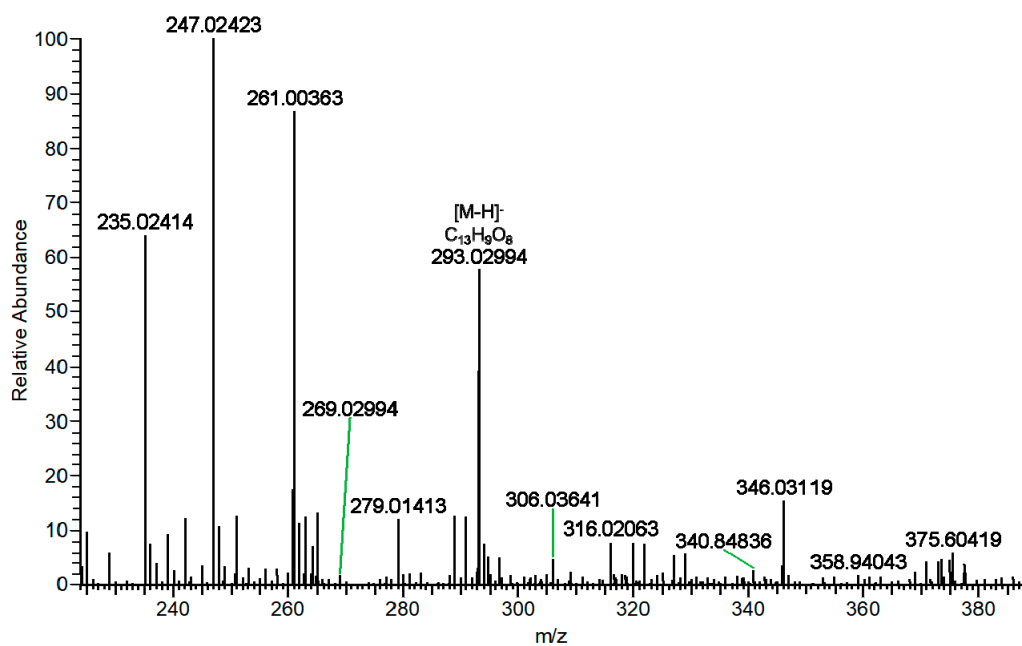

Figure S11. HRESIMS spectrum of **2**

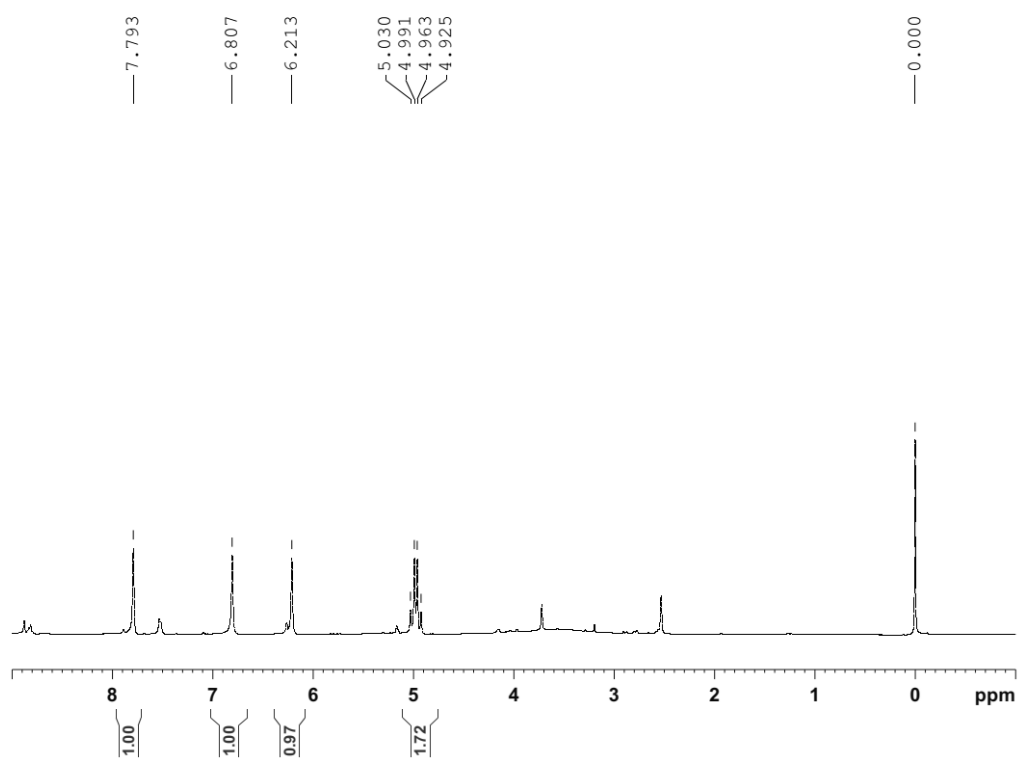

Figure S12.  $^1\text{H}$  NMR (500 MHz,  $\text{DMSO-}d_6$ ) spectrum of **3**

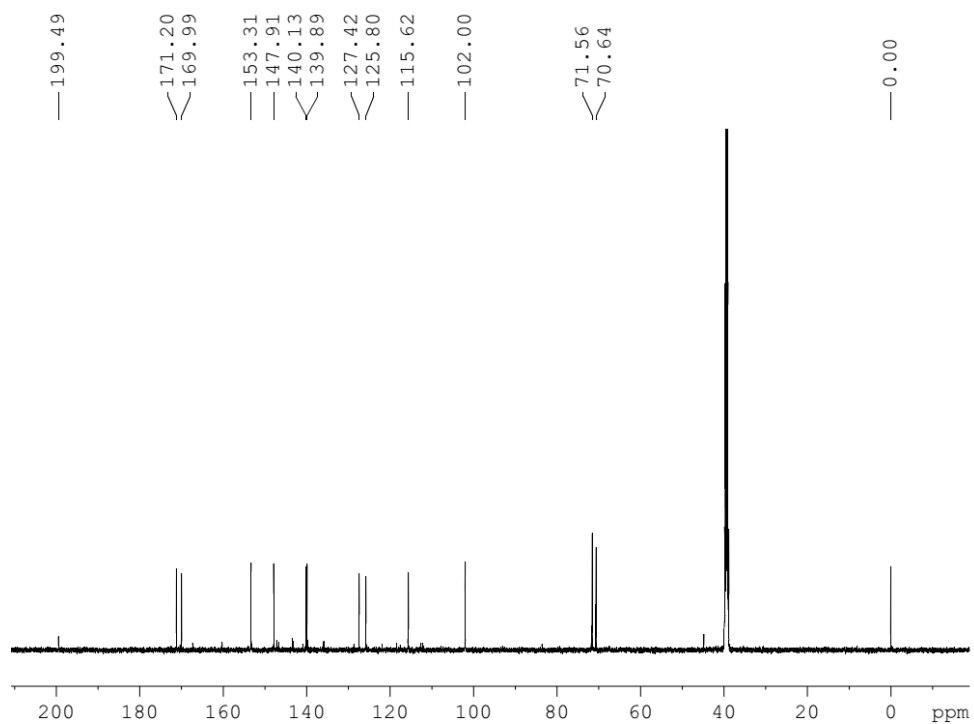

Figure S13.  $^{13}\text{C}$  NMR (125 MHz,  $\text{DMSO-}d_6$ ) spectrum of **3**

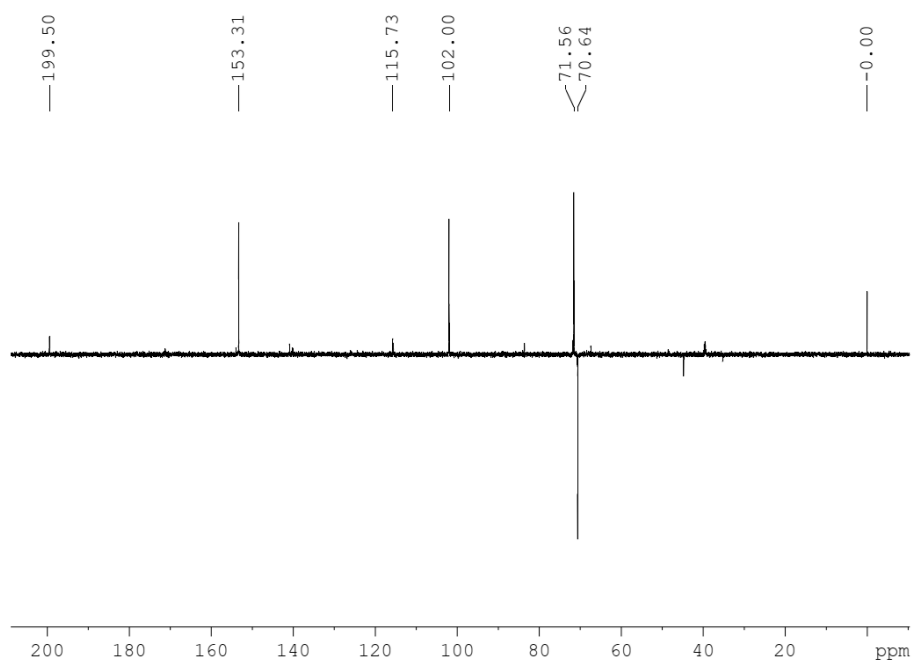

**Figure S14.** DEPT (125 MHz, DMSO-*d*<sub>6</sub>) spectrum of **3**

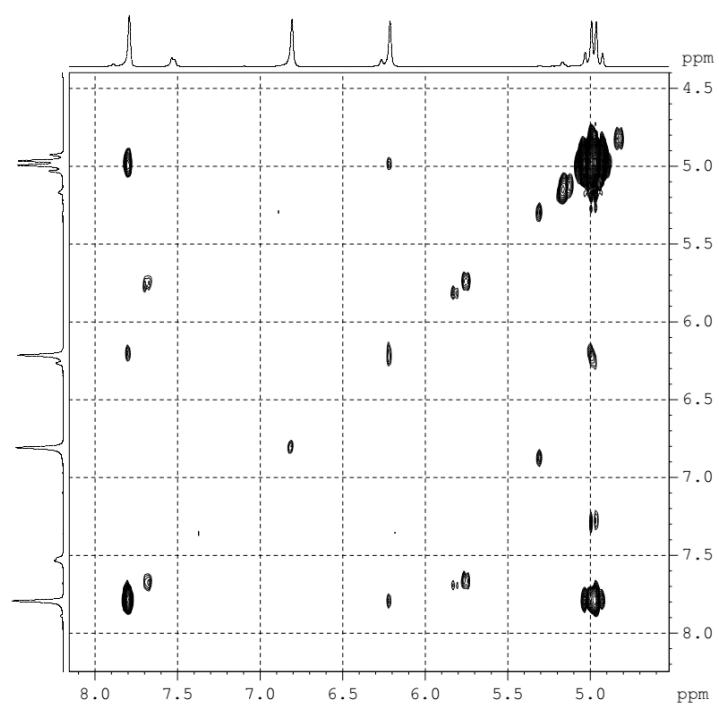

**Figure S15.** <sup>1</sup>H <sup>1</sup>H COSY (DMSO-*d*<sub>6</sub>) spectrum of **3**

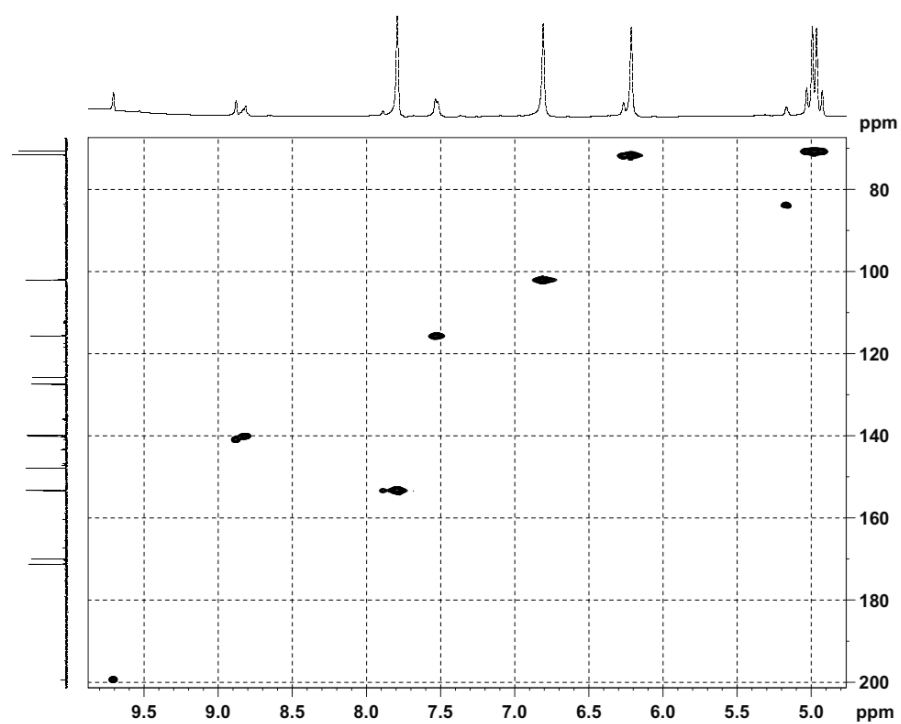

Figure S16. HSQC (DMSO-*d*<sub>6</sub>) spectrum of 3

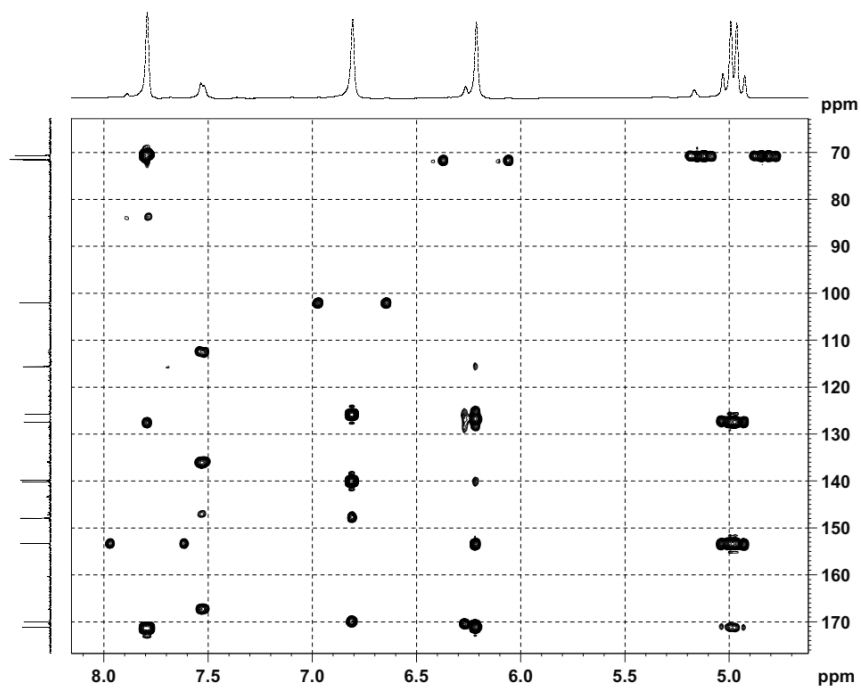

Figure S17. HMBC (DMSO-*d*<sub>6</sub>) spectrum of 3

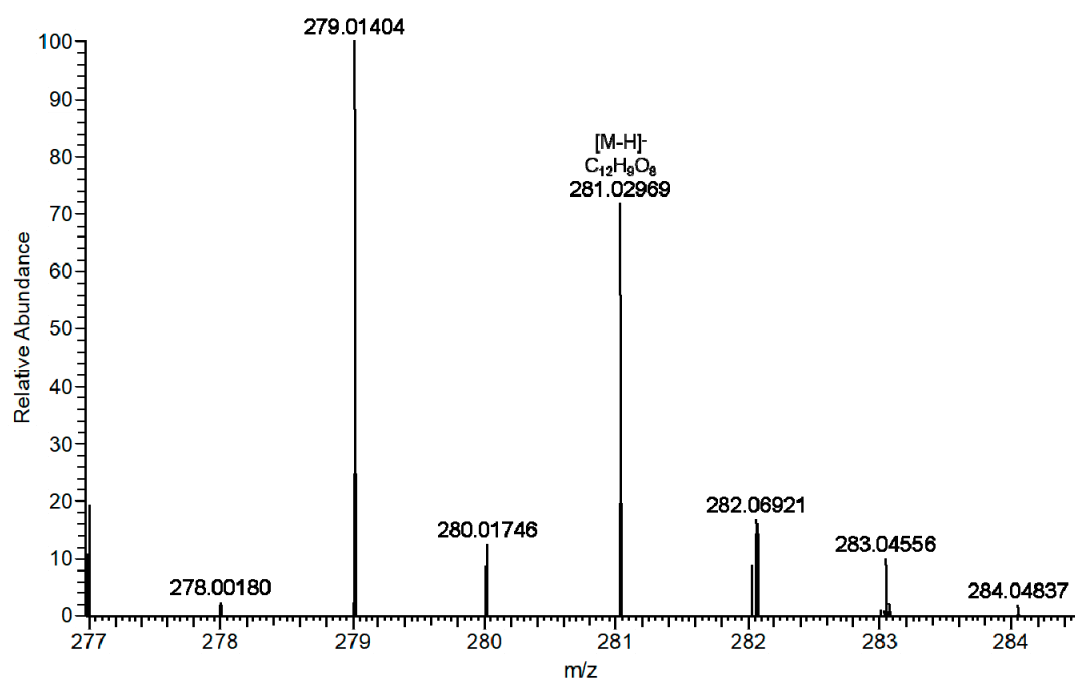

Figure S18. HRESIMS spectrum of 3

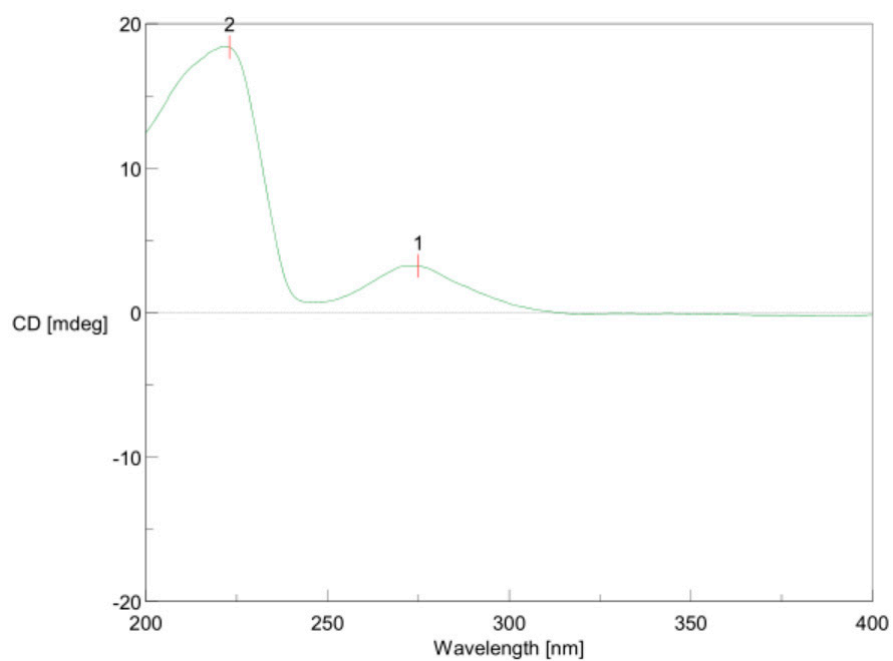

Figure S19. The experimental ECD spectrum of compound 3 in MeOH

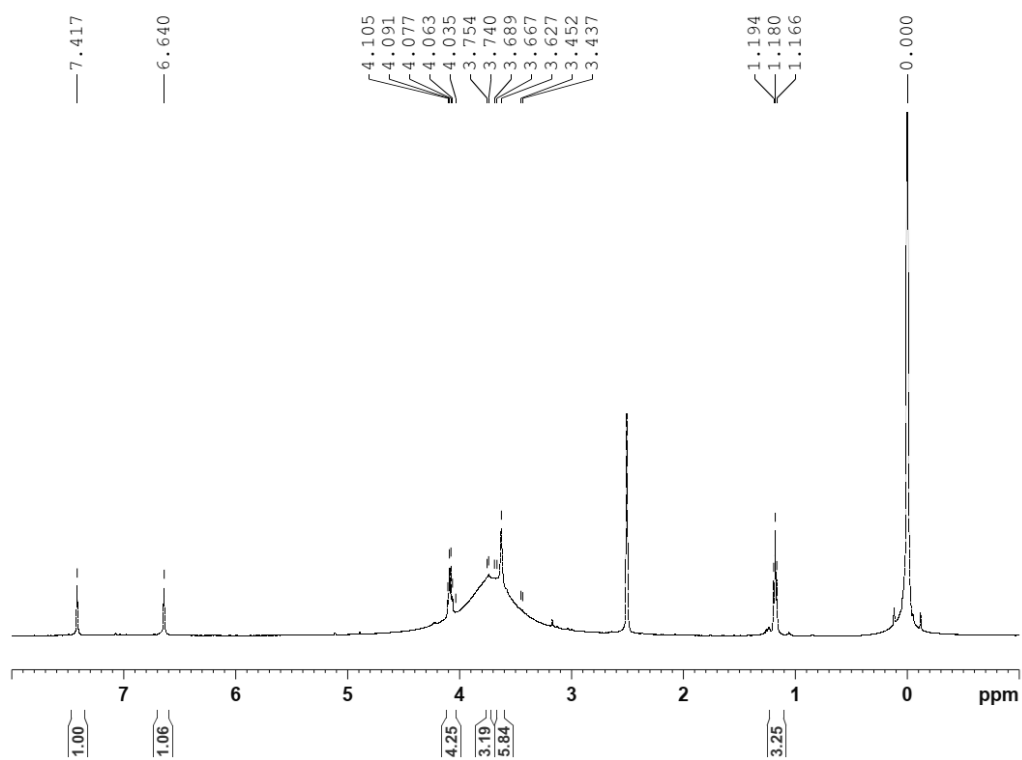

**Figure S20.** <sup>1</sup>H NMR (500 MHz, DMSO-*d*<sub>6</sub>) spectrum of **4**

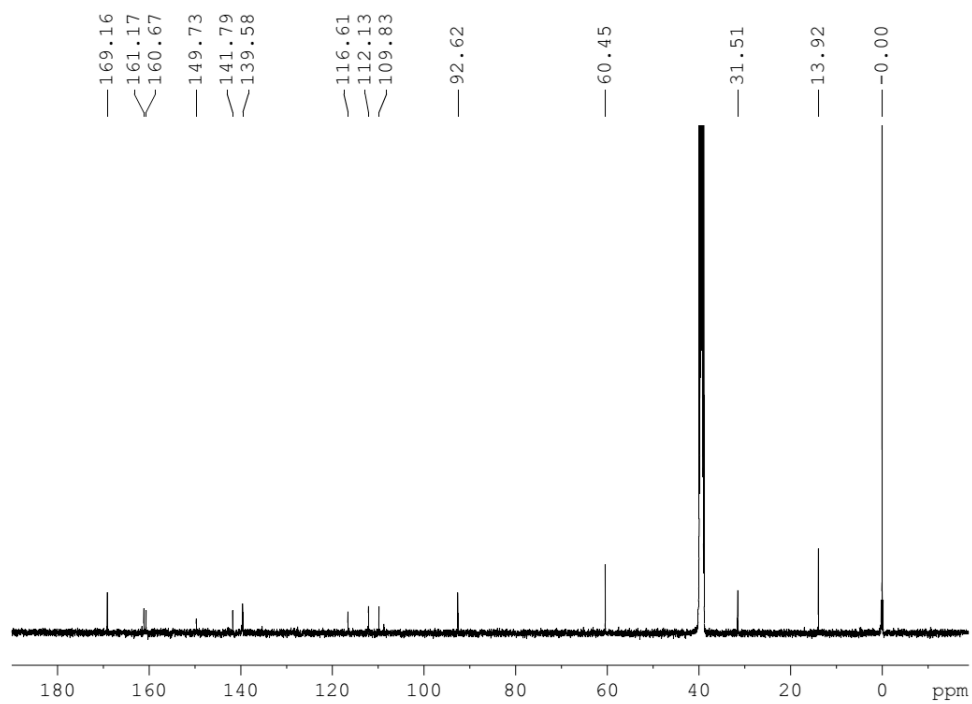

**Figure S21.** <sup>13</sup>C NMR (125 MHz, DMSO-*d*<sub>6</sub>) spectrum of **4**

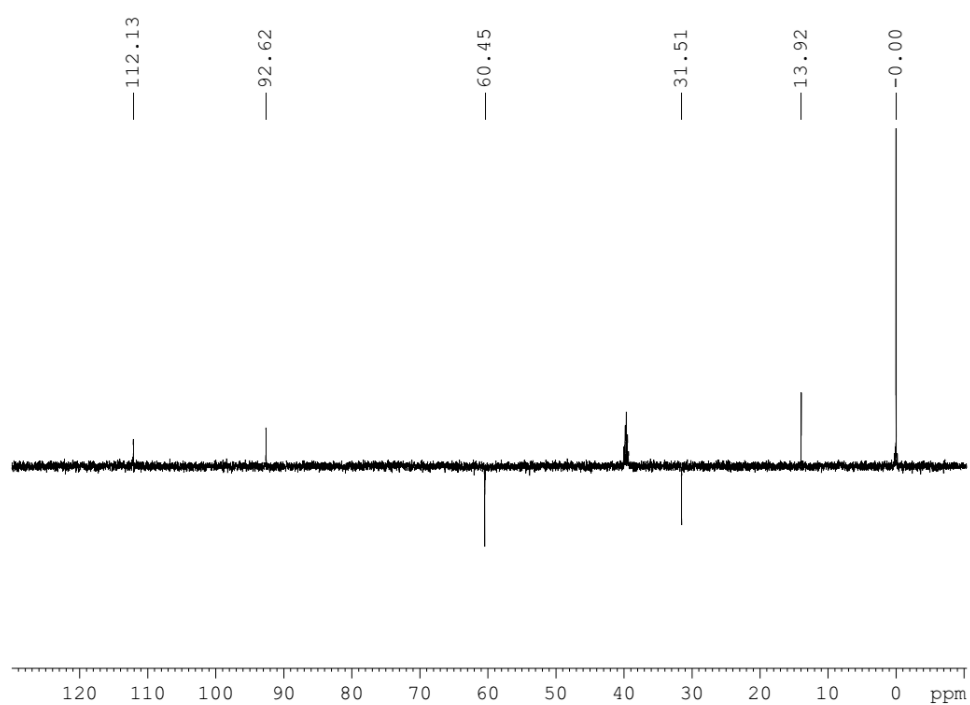

Figure S22. DEPT (125 MHz, DMSO-*d*<sub>6</sub>) spectrum of **4**

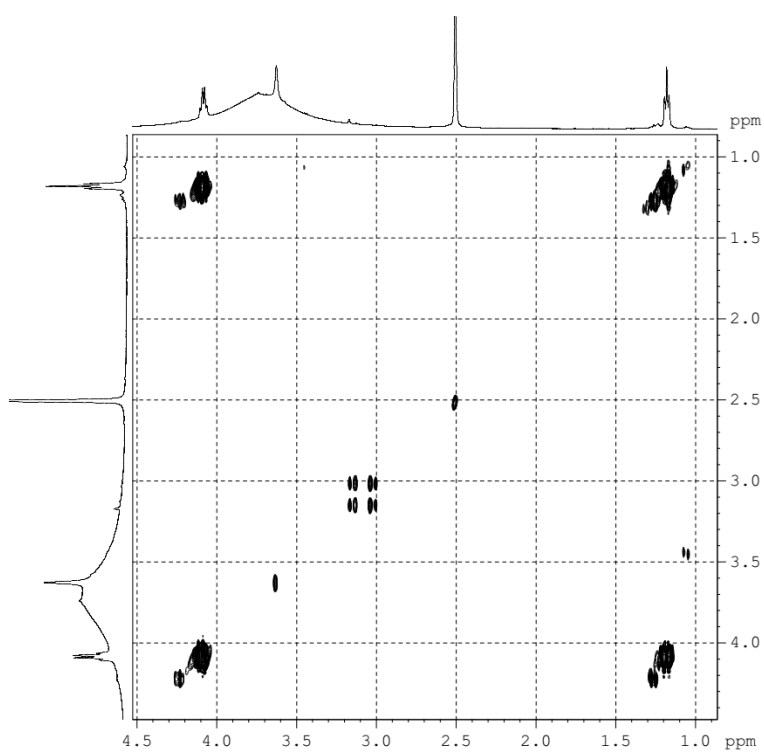

Figure S23. <sup>1</sup>H <sup>1</sup>H COSY (DMSO-*d*<sub>6</sub>) spectrum of **4**

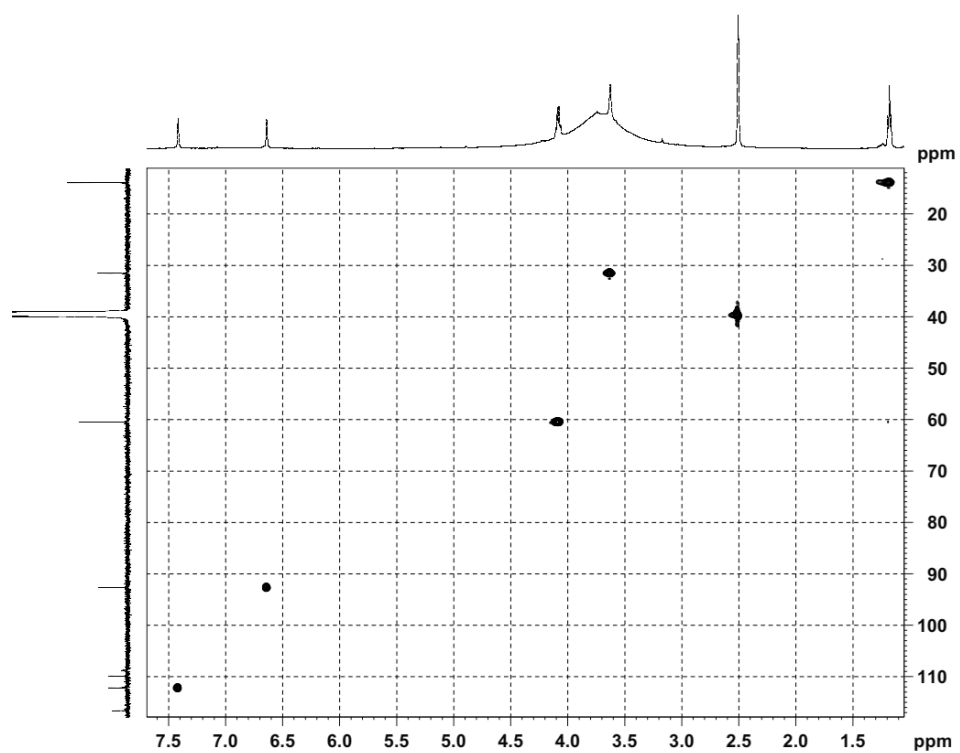

Figure S24. HSQC (DMSO- $d_6$ ) spectrum of 4

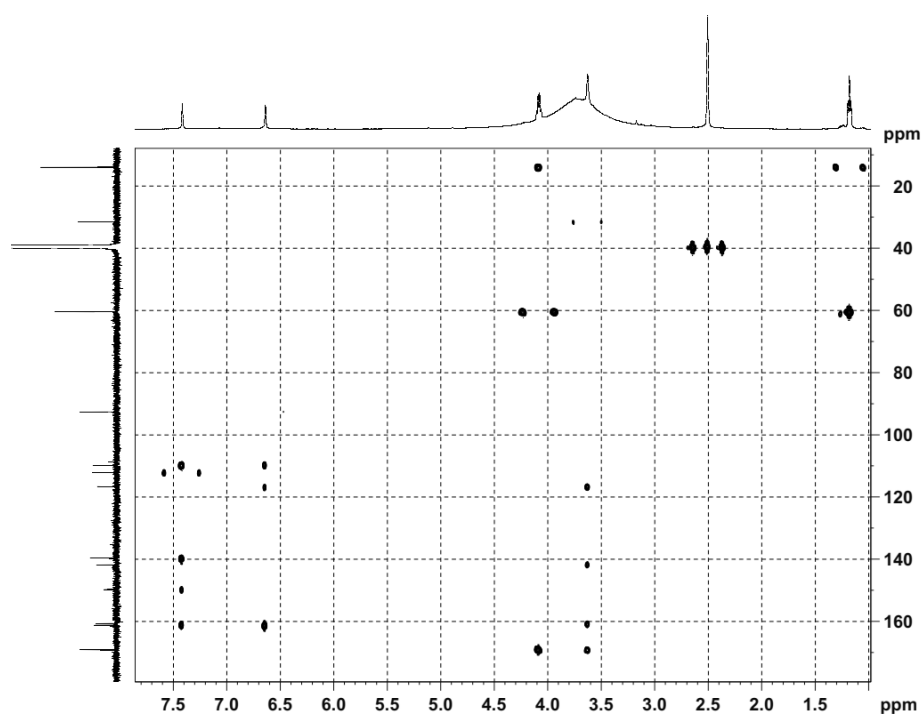

Figure S25. HMBC (DMSO- $d_6$ ) spectrum of 4



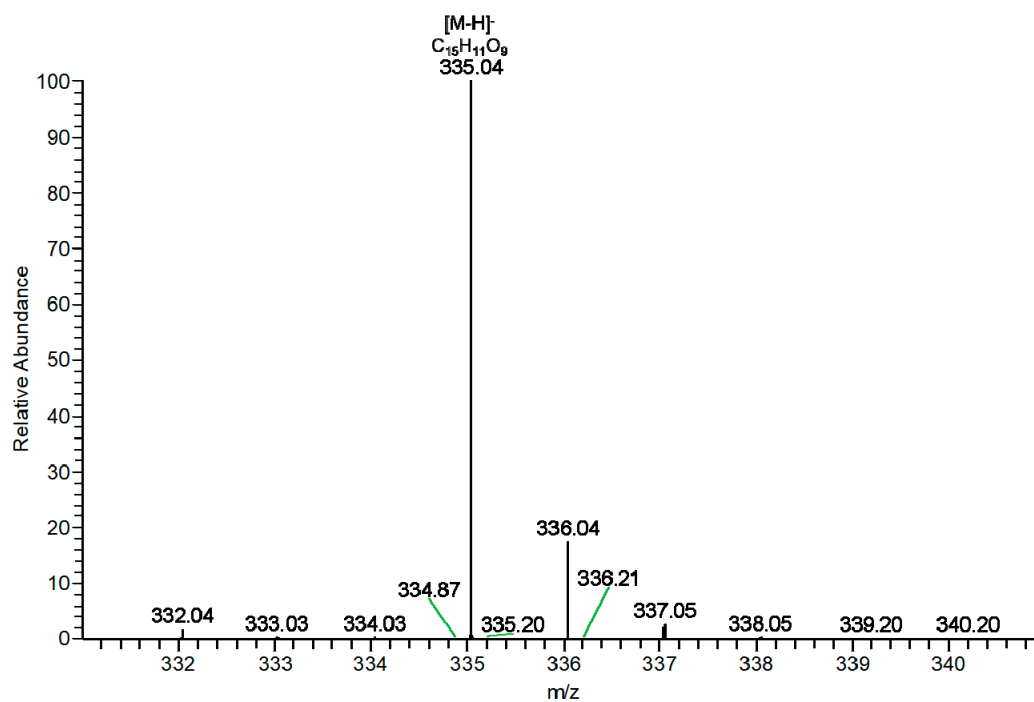

Figure S26. HRESIMS spectrum of 4

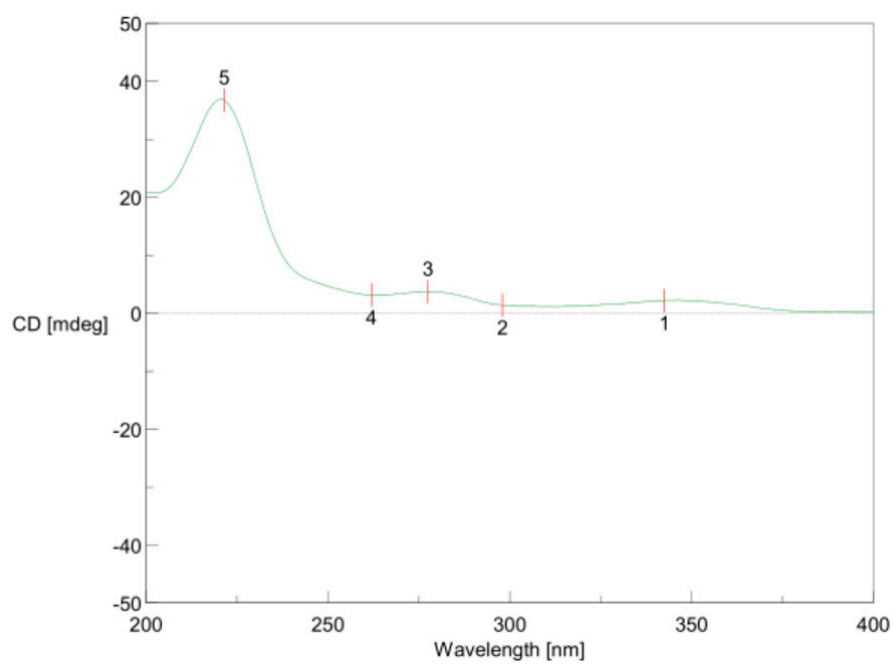

Figure S27. The experimental ECD spectrum of compound 4 in MeOH

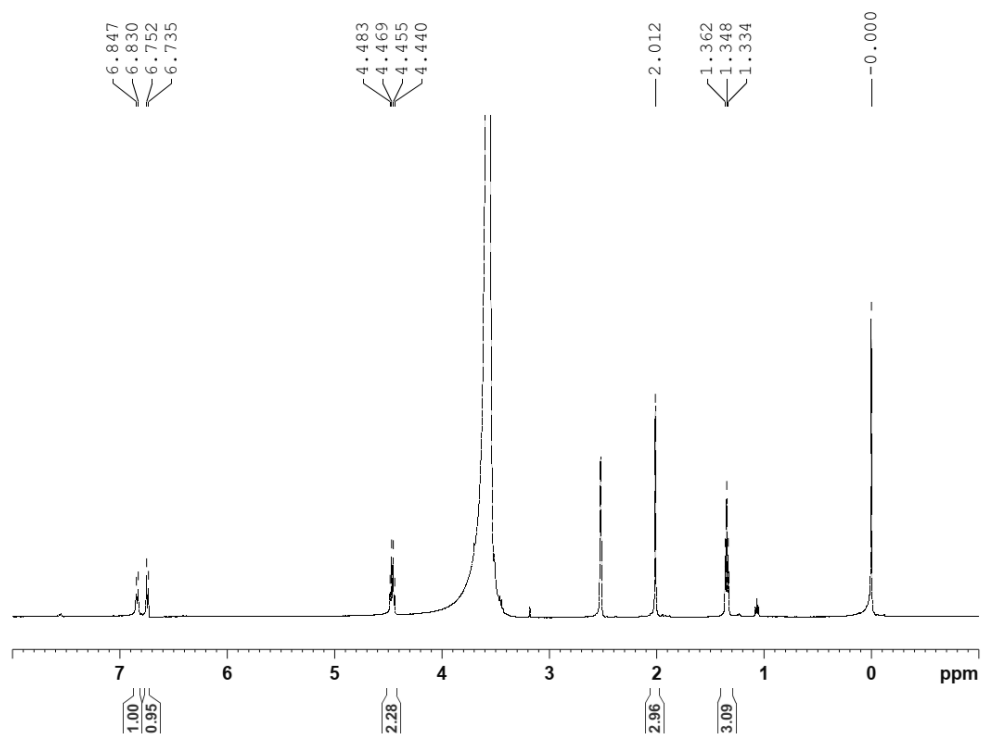

**Figure S28.** <sup>1</sup>H NMR (500 MHz, DMSO-*d*<sub>6</sub>) spectrum of 5

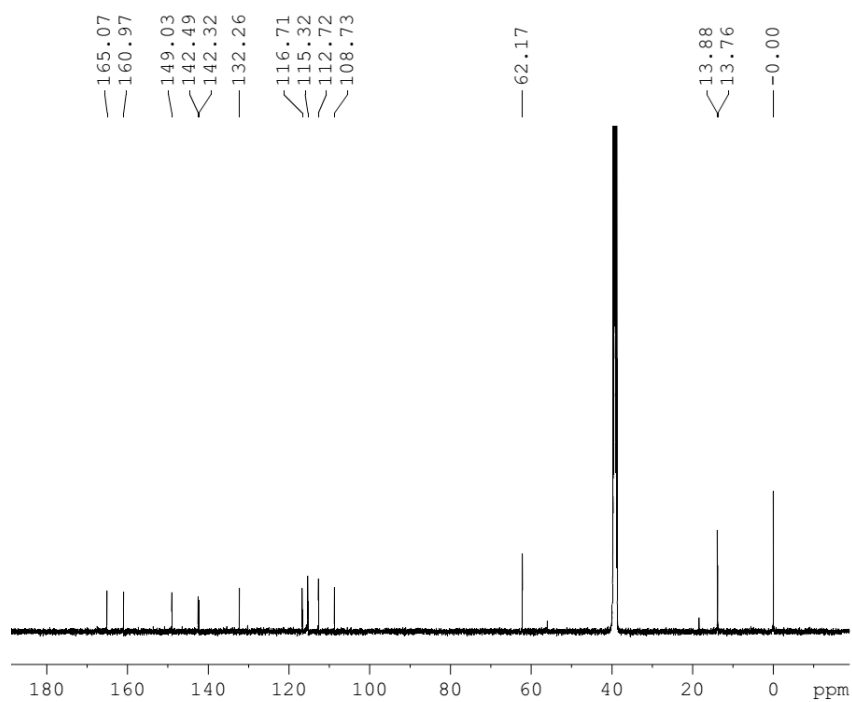

**Figure S29.** <sup>13</sup>C NMR (125 MHz, DMSO-*d*<sub>6</sub>) spectrum of 5

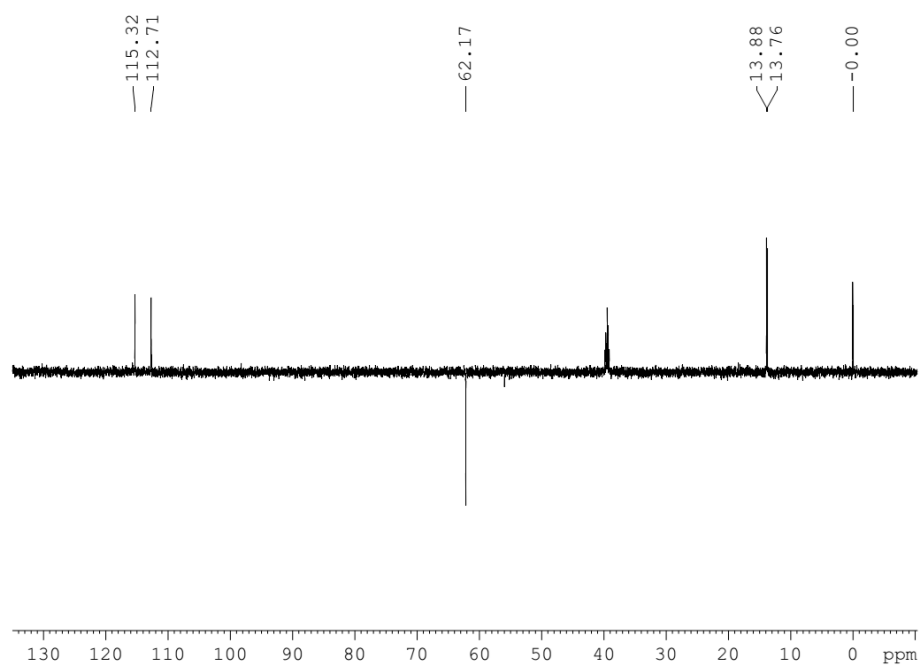

Figure S30. DEPT (125 MHz, DMSO- $d_6$ ) spectrum of 5

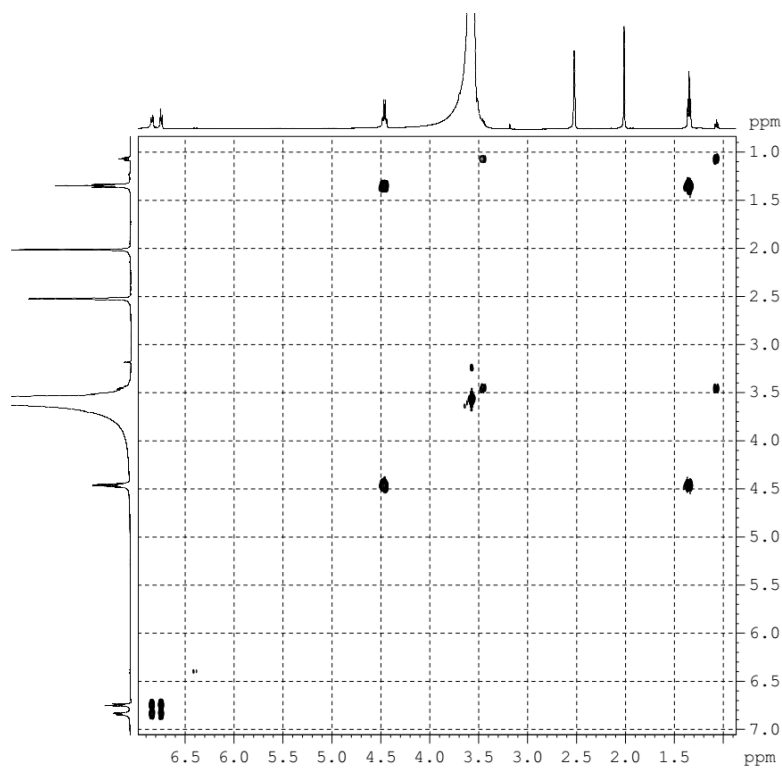

Figure S31.  $^1\text{H}$ - $^1\text{H}$  COSY (DMSO- $d_6$ ) spectrum of 5

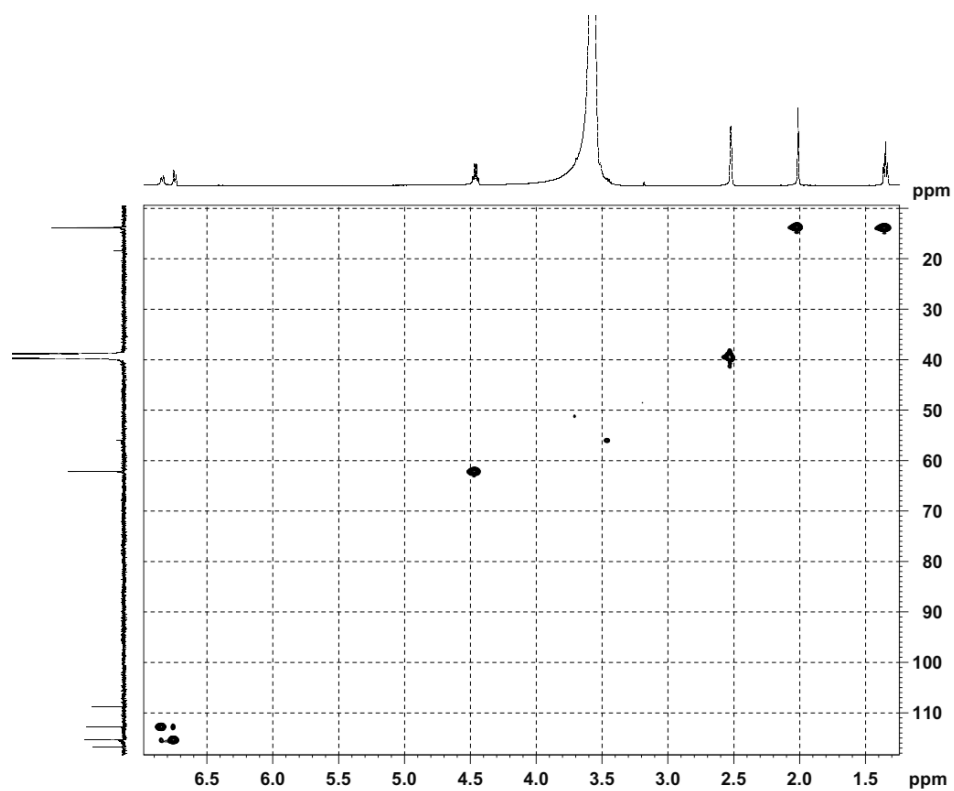

Figure S32. HSQC (DMSO- $d_6$ ) spectrum of 5

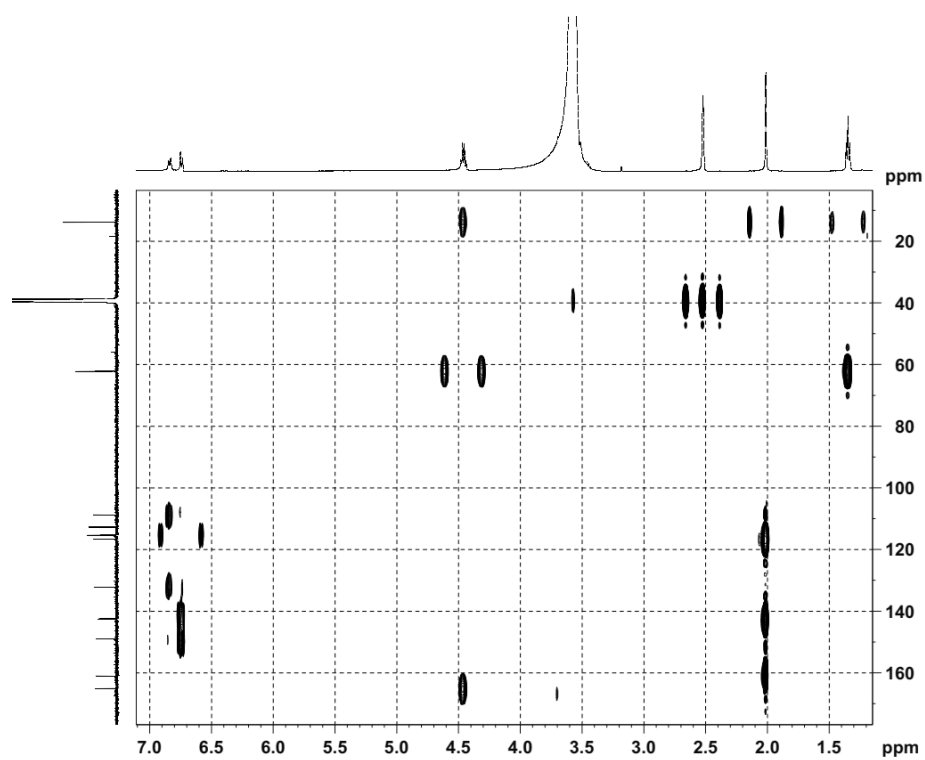

Figure S33. HMBC (DMSO- $d_6$ ) spectrum of 5

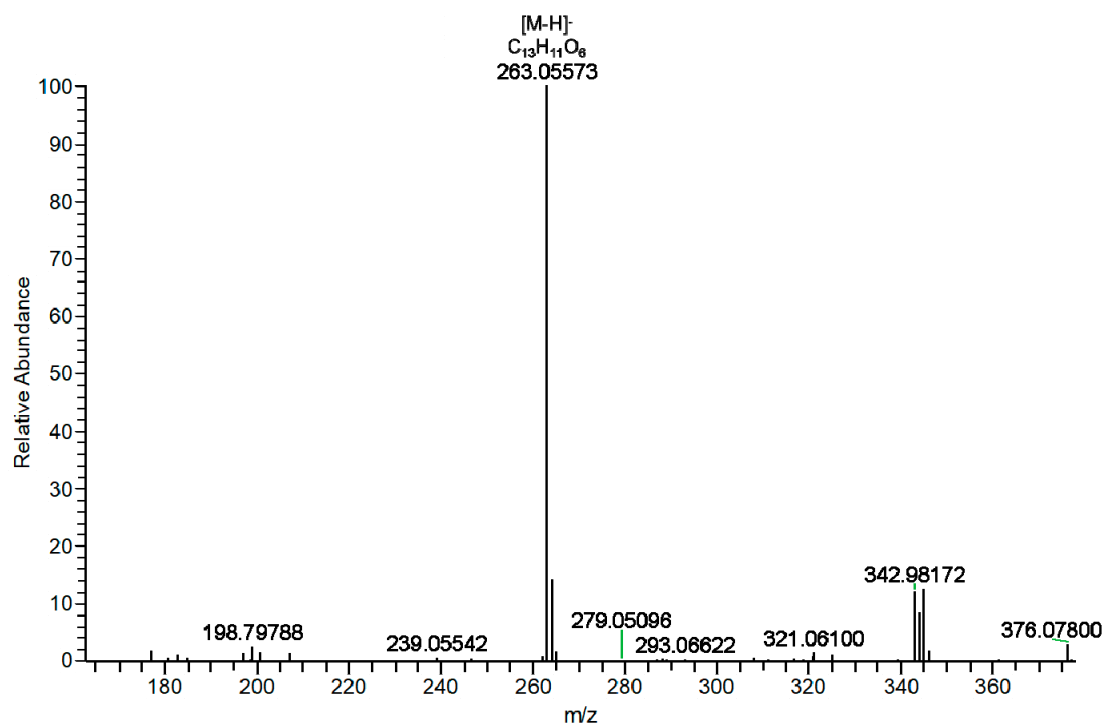

Figure S34. HRESIMS spectrum of 5

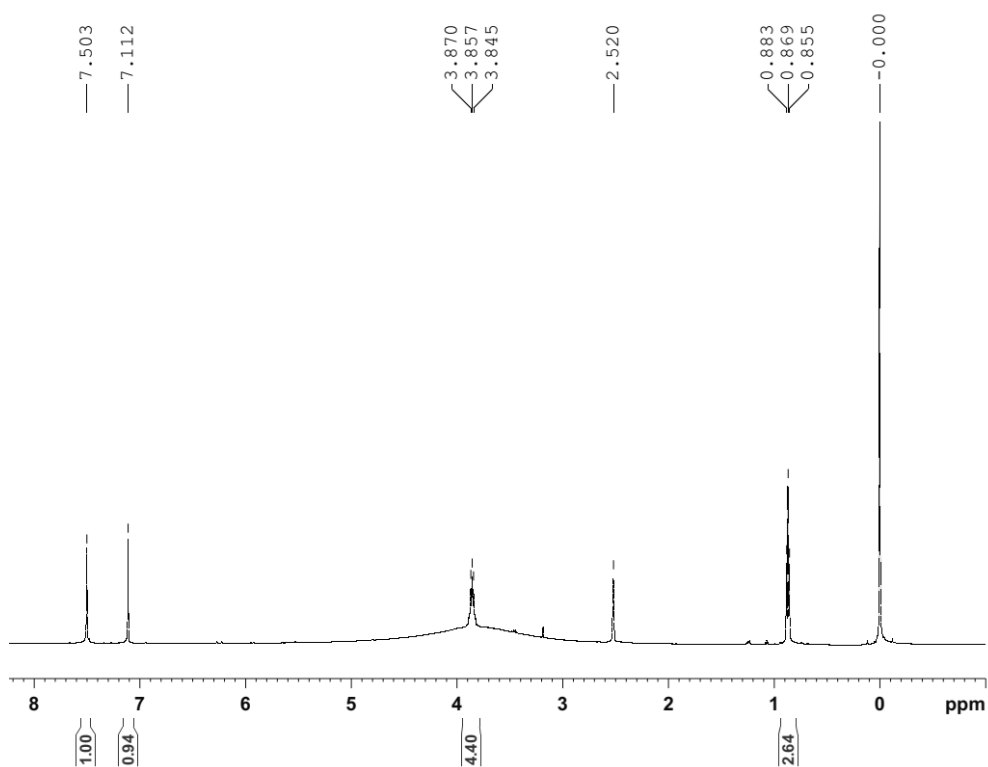

**Figure S35.** <sup>1</sup>H NMR (500 MHz, DMSO-*d*<sub>6</sub>) spectrum of **6**

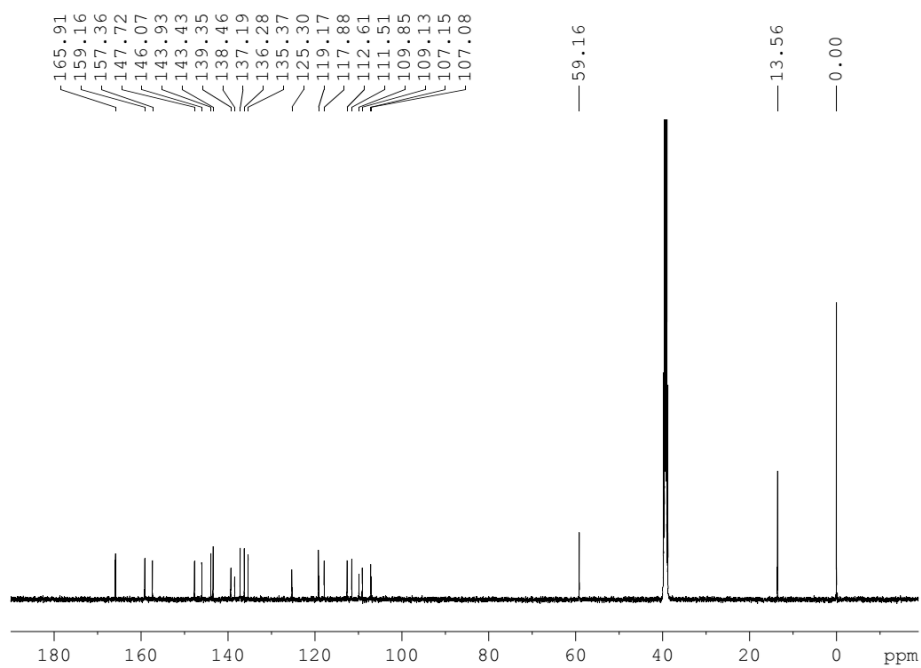

**Figure S36.** <sup>13</sup>C NMR (125 MHz, DMSO-*d*<sub>6</sub>) spectrum of **6**

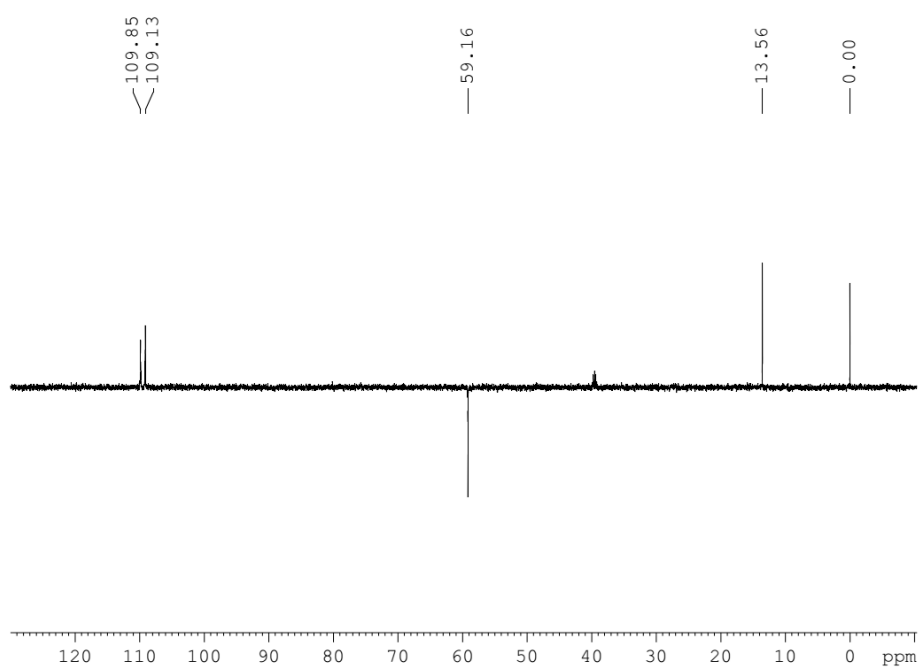

Figure S37. DEPT (125 MHz, DMSO-*d*<sub>6</sub>) spectrum of **6**

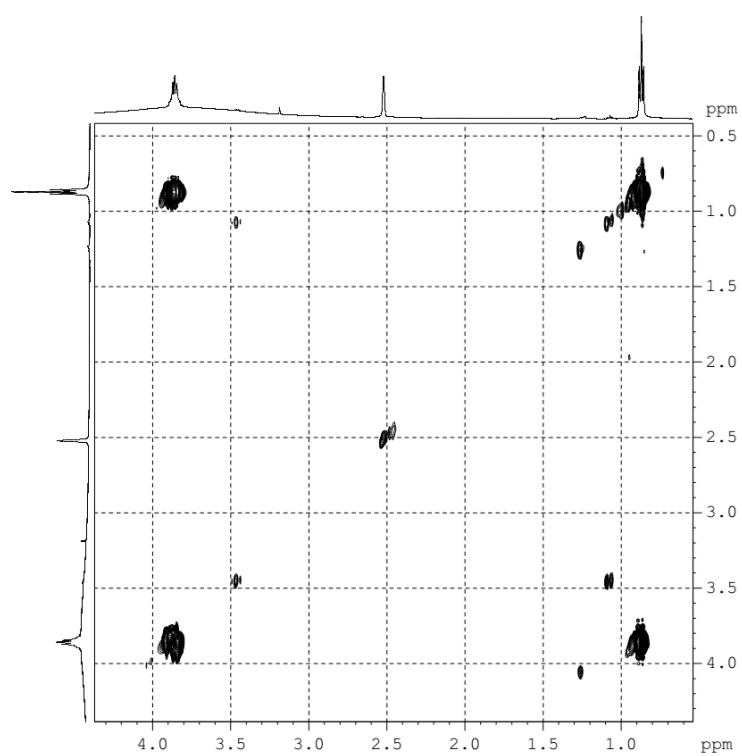

Figure S38. <sup>1</sup>H <sup>1</sup>H COSY (DMSO-*d*<sub>6</sub>) spectrum of **6**

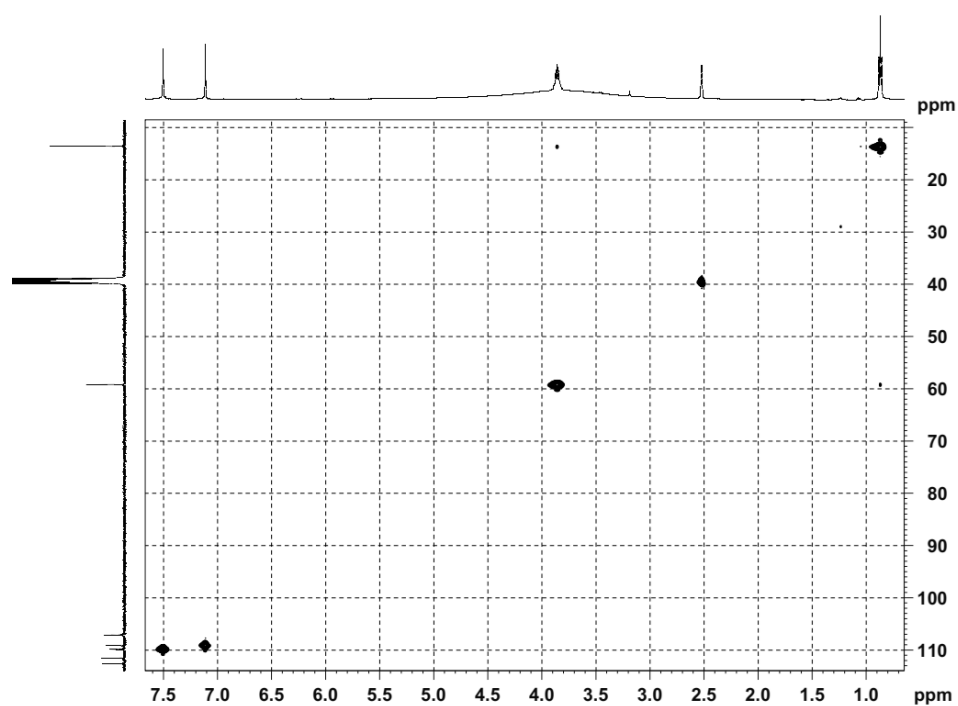

Figure S39. HSQC (DMSO- $d_6$ ) spectrum of **6**

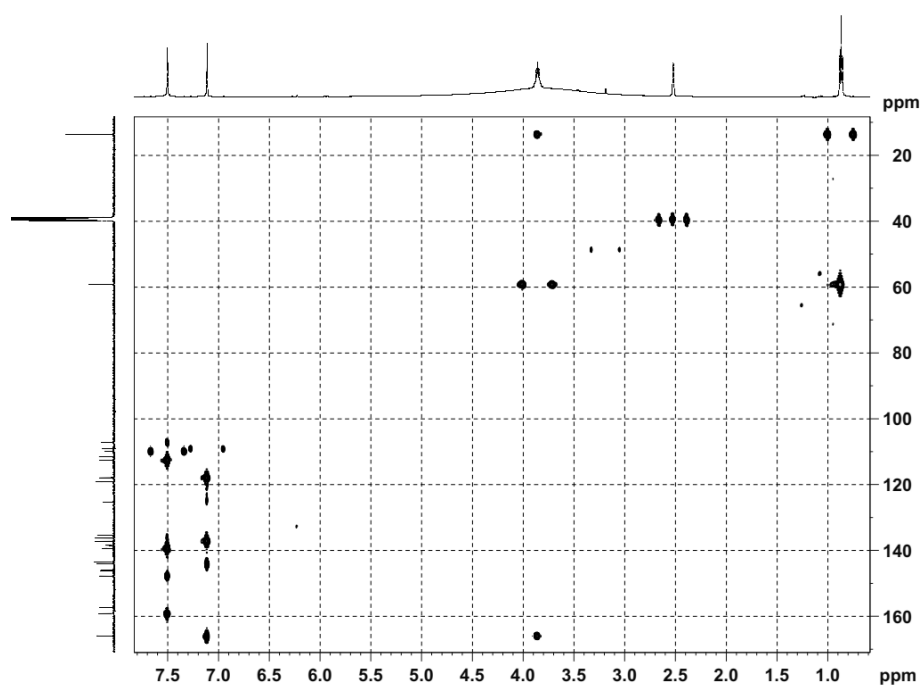

Figure S40. HMBC (DMSO- $d_6$ ) spectrum of **6**



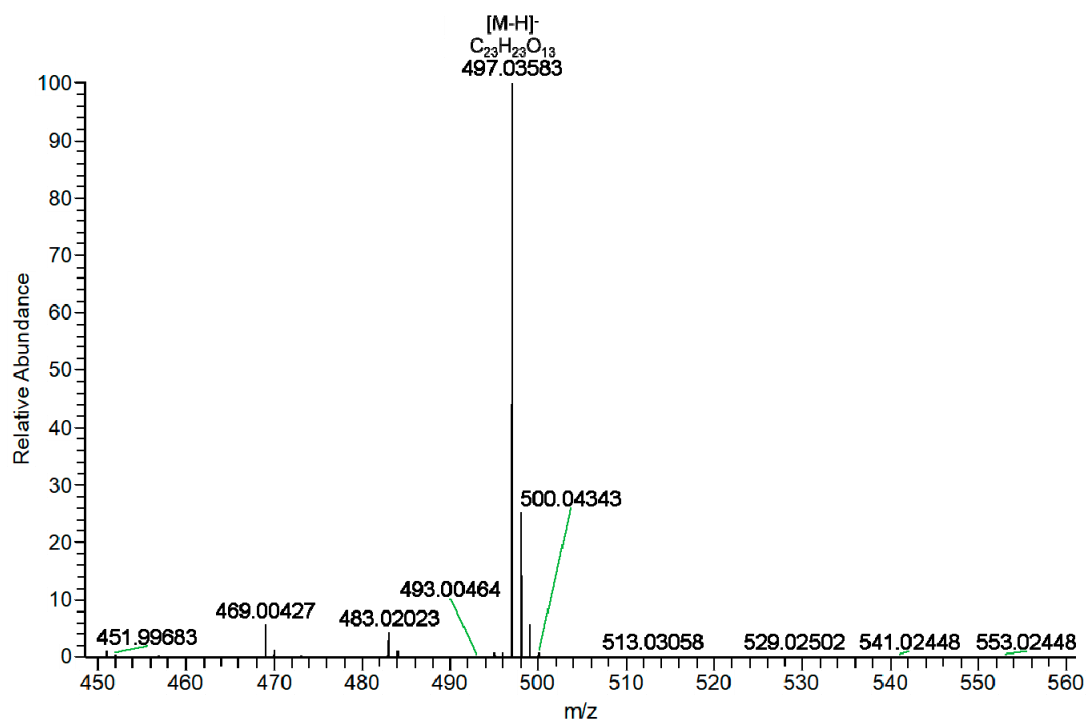

Figure S41. HRESIMS spectrum of 6

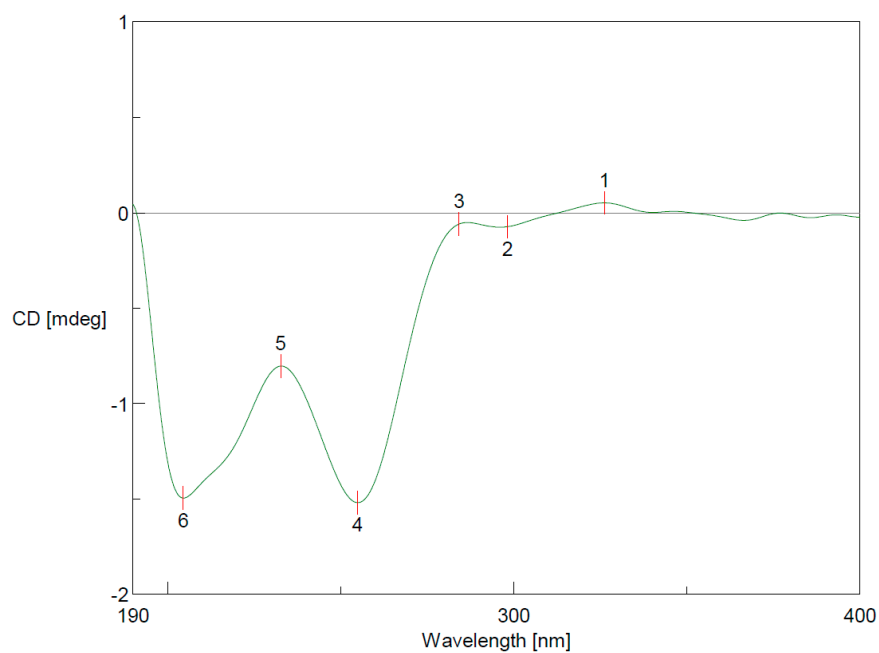

Figure S42. The experimental ECD spectrum of compound 6 in MeOH

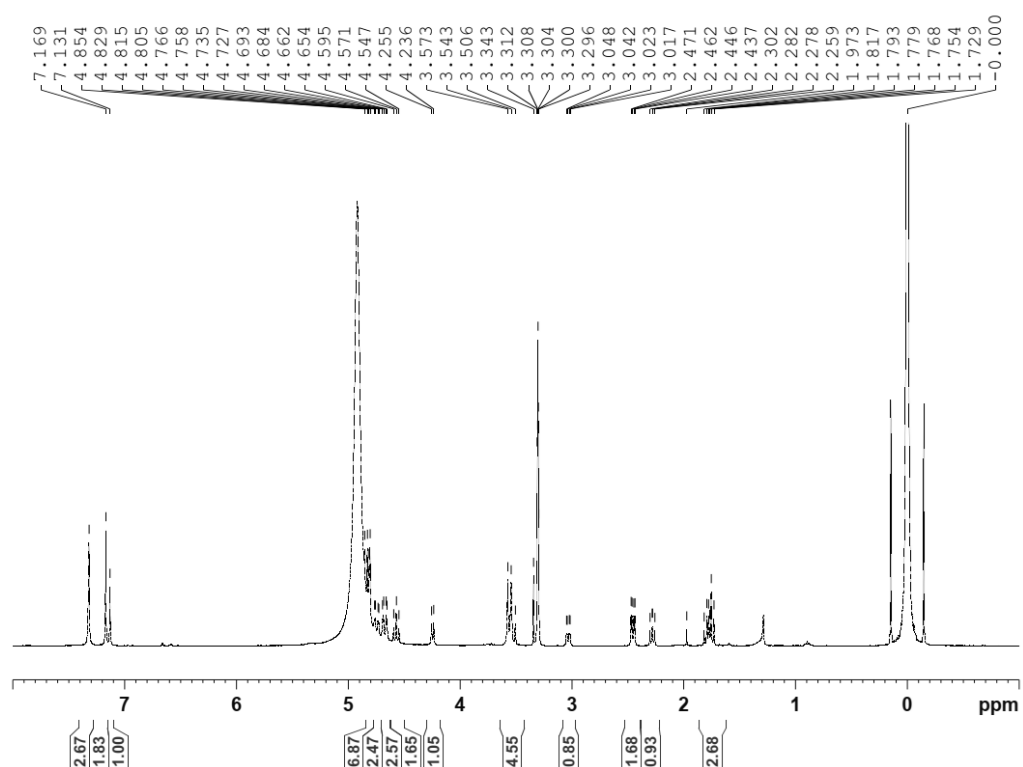

Figure S43.  $^1\text{H}$  NMR (400 MHz,  $\text{CD}_3\text{OD}$ ) spectrum of **7**

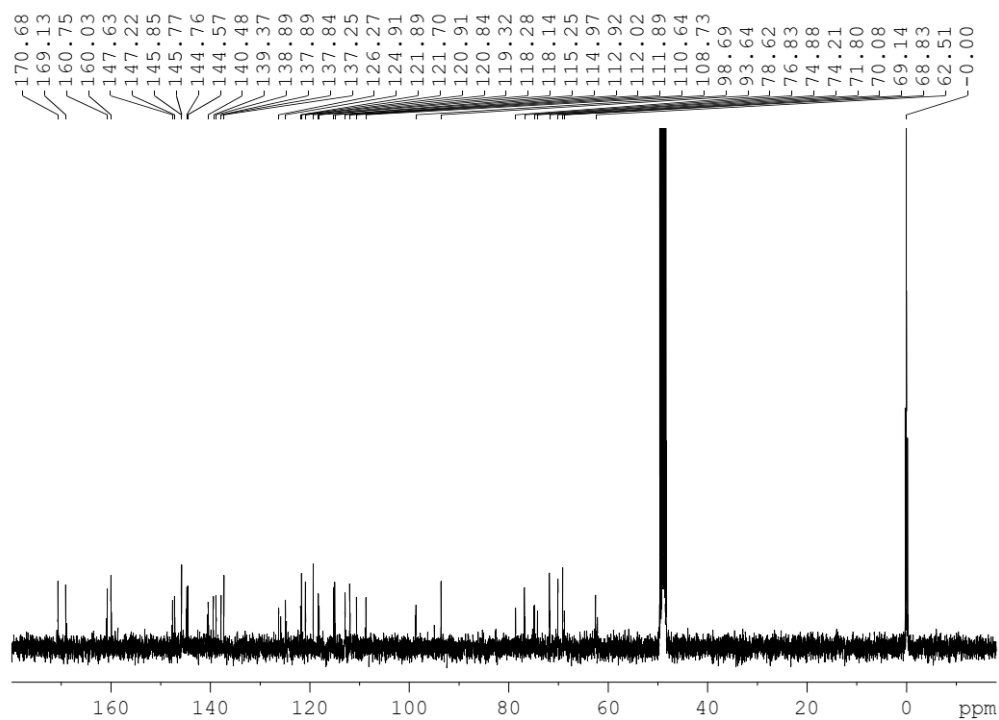

Figure S44.  $^{13}\text{C}$  NMR (100 MHz,  $\text{CD}_3\text{OD}$ ) spectrum of **7**

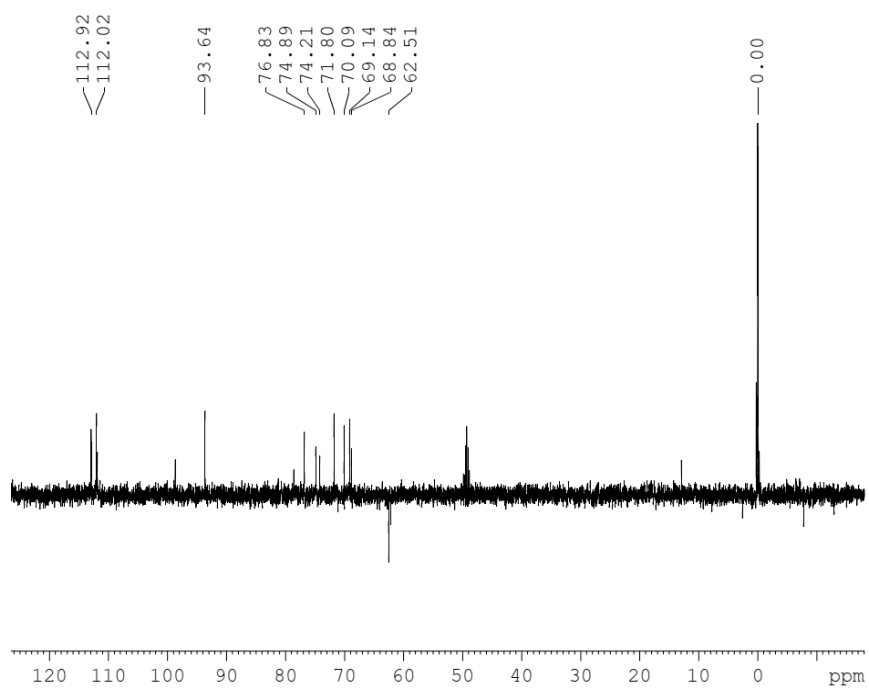

**Figure S45.** DEPT (100 MHz, CD<sub>3</sub>OD) spectrum of **7**

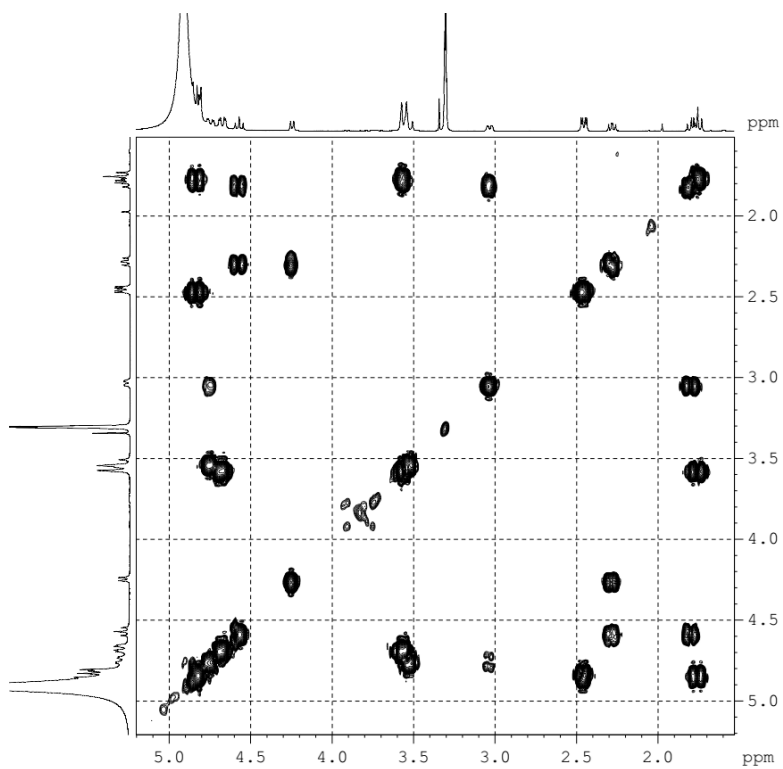

**Figure S46.** <sup>1</sup>H-<sup>1</sup>H COSY (CD<sub>3</sub>OD) spectrum of **7**

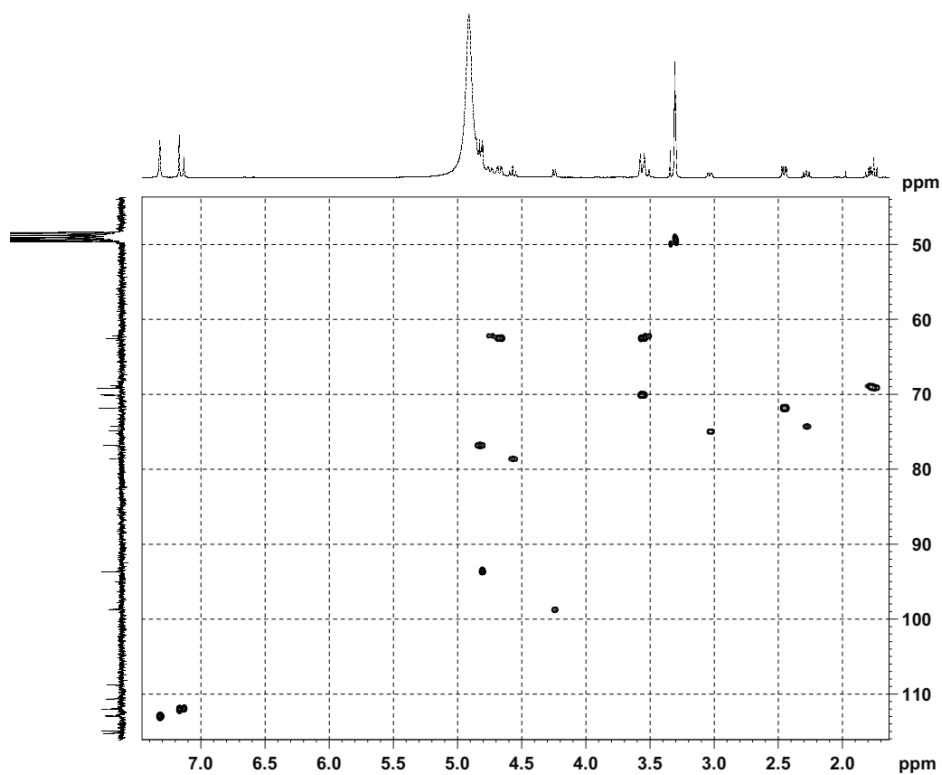

Figure S47. HSQC (CD<sub>3</sub>OD) spectrum of 7

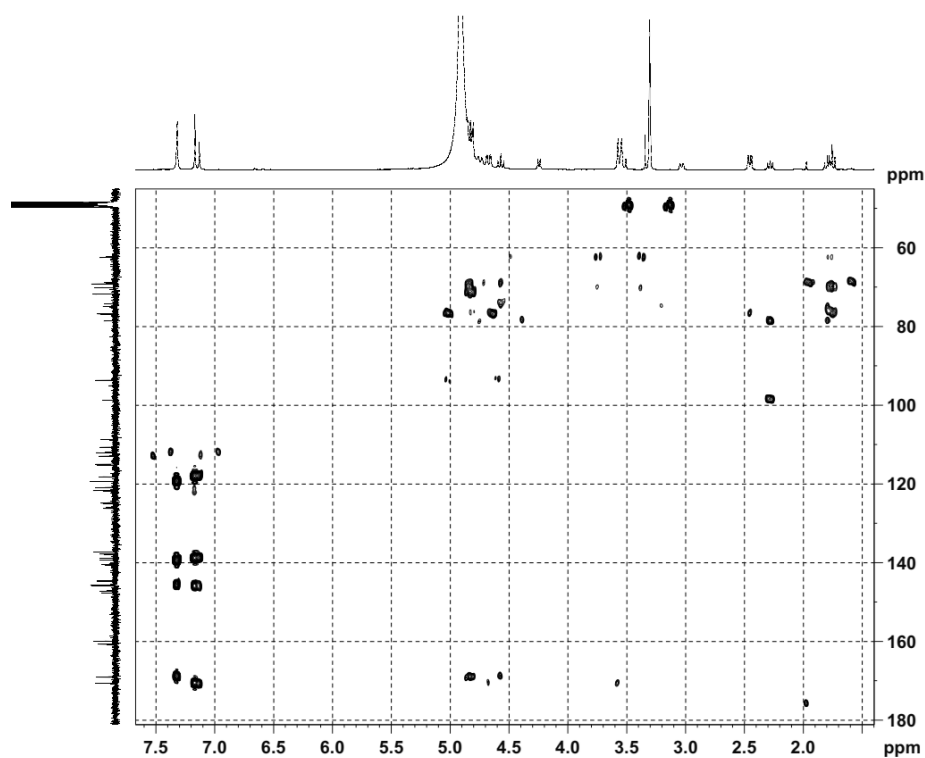

Figure S48. HMBC (CD<sub>3</sub>OD) spectrum of 7

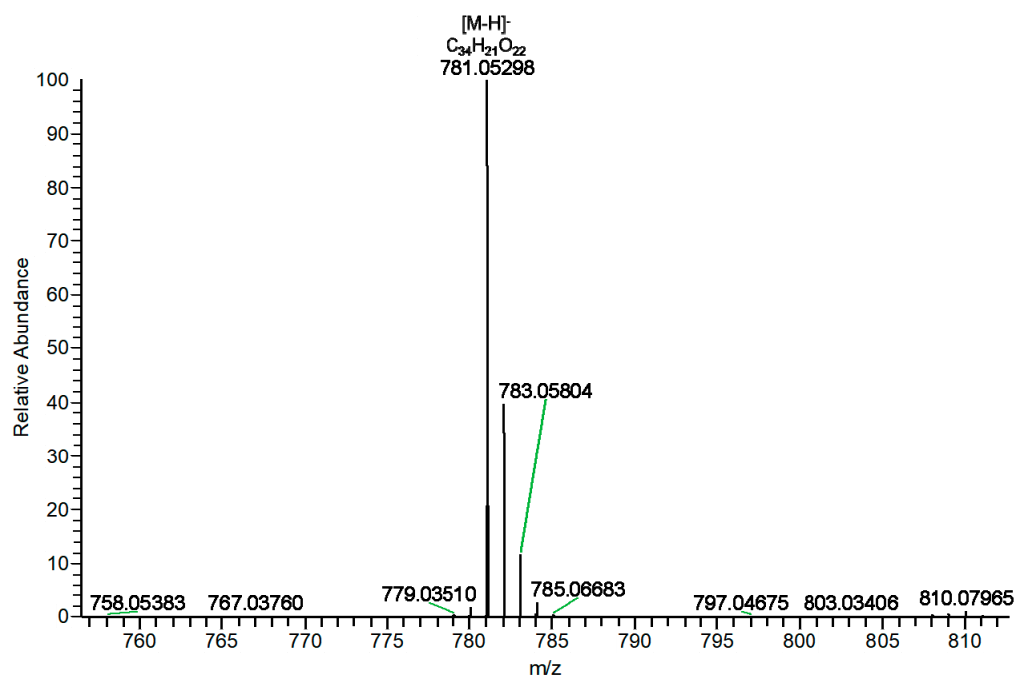

Figure S49. HRESIMS spectrum of 7

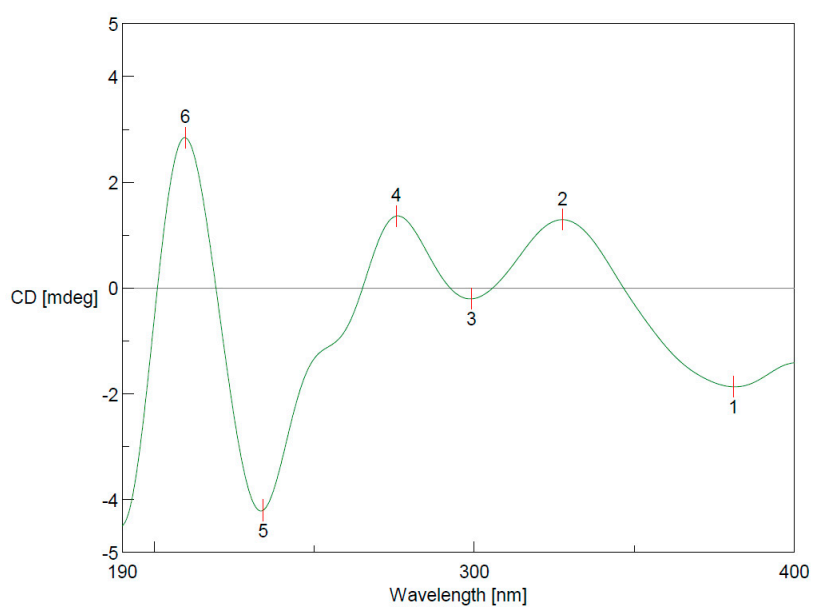

Figure S50. The experimental ECD spectrum of compound 7 in MeOH

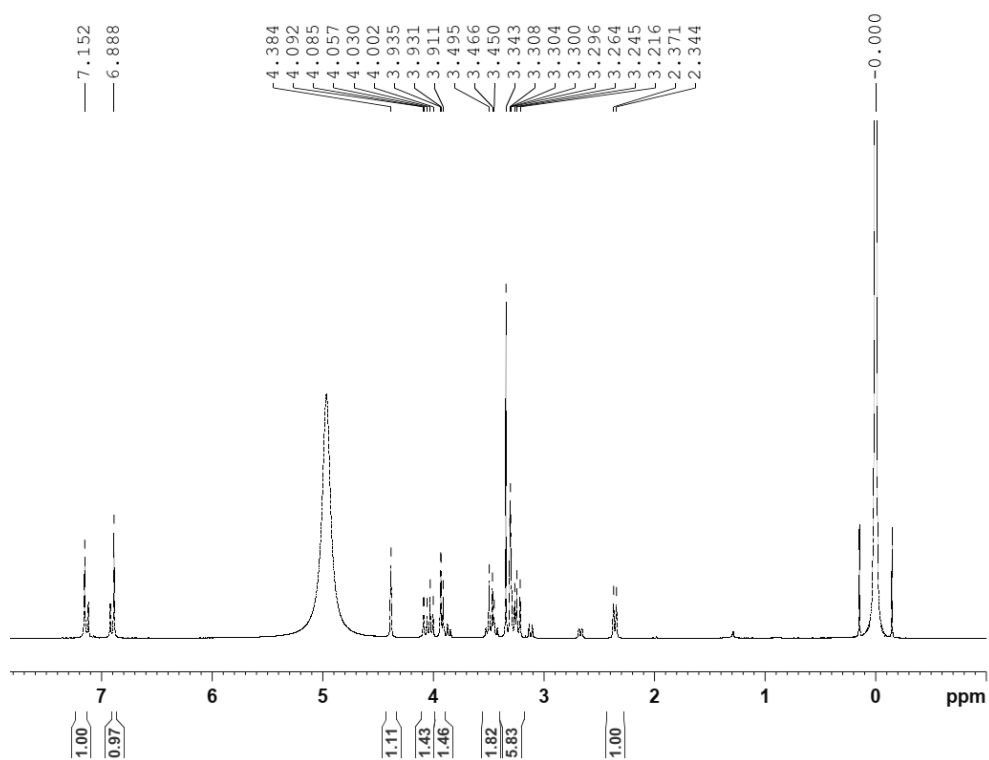

Figure S51.  $^1\text{H}$  NMR (400 MHz,  $\text{CD}_3\text{OD}$ ) spectrum of **8**

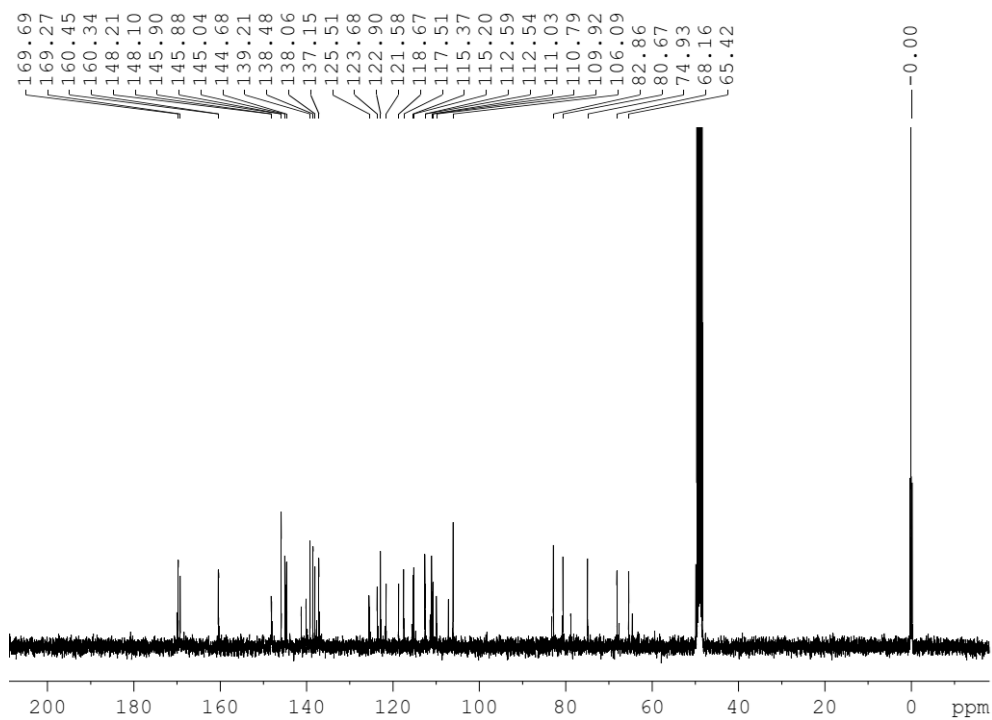

Figure S52.  $^{13}\text{C}$  NMR (100 MHz,  $\text{CD}_3\text{OD}$ ) spectrum of **8**

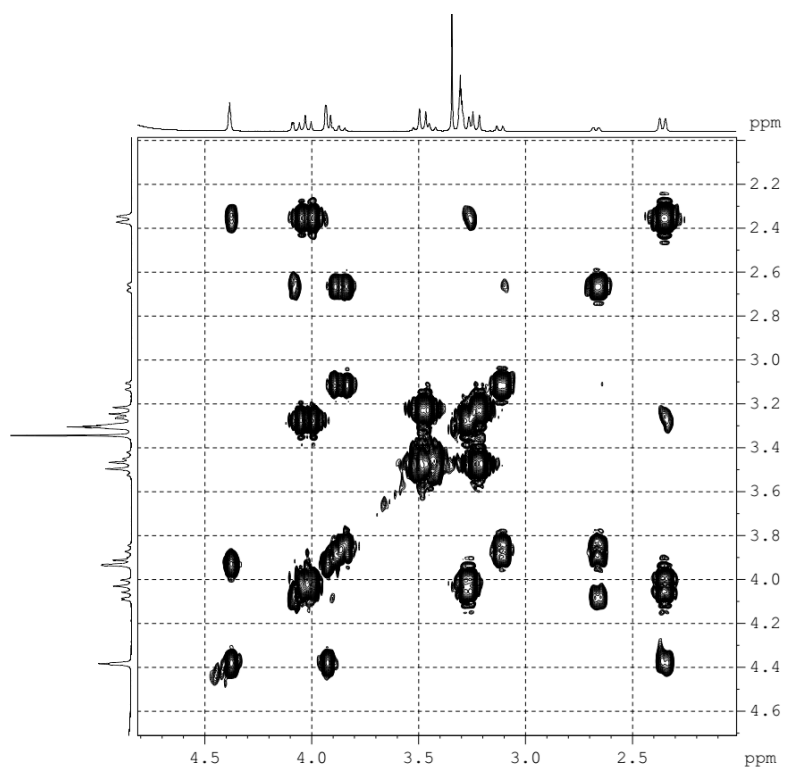

Figure S53.  $^1\text{H}$   $^1\text{H}$  COSY ( $\text{CD}_3\text{OD}$ ) spectrum of **8**

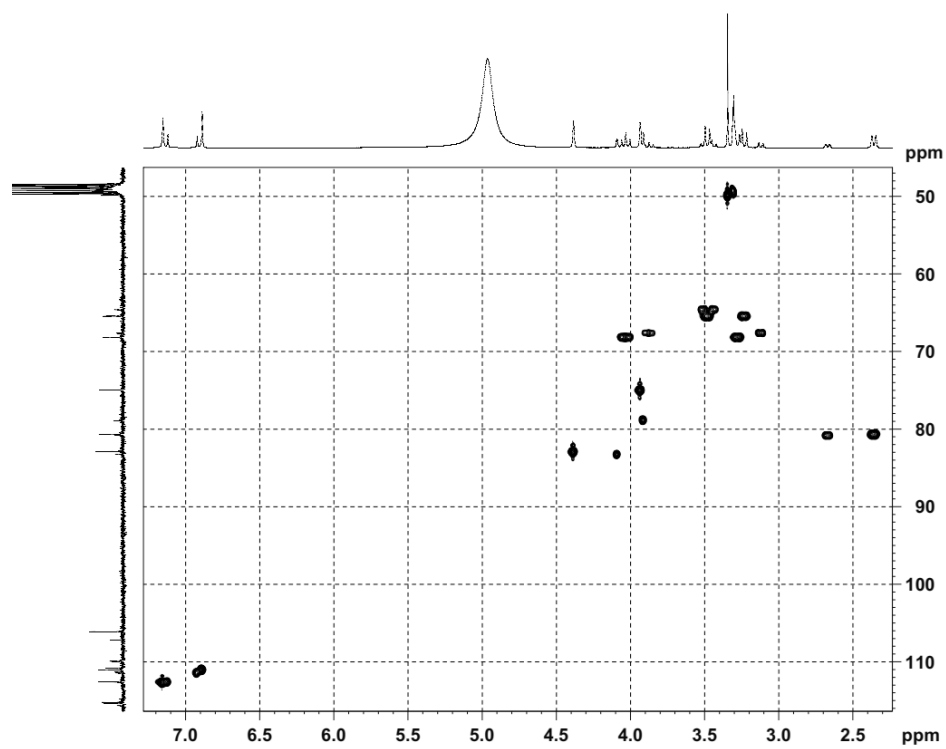

Figure S54. HSQC ( $\text{CD}_3\text{OD}$ ) spectrum of **8**

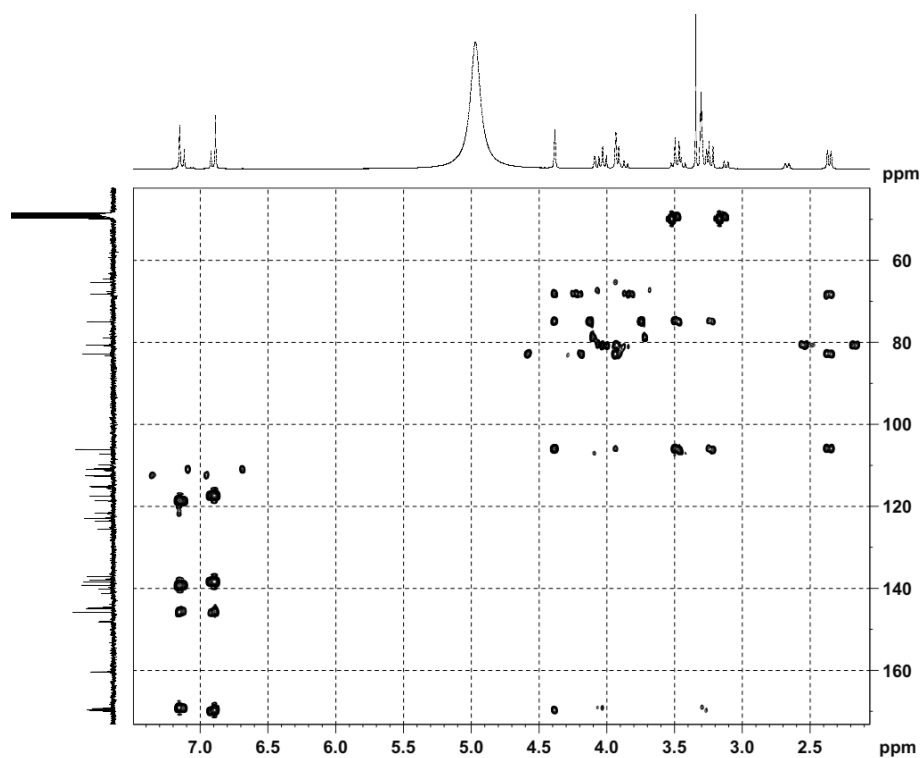

Figure S55. HMBC (CD<sub>3</sub>OD) spectrum of 8

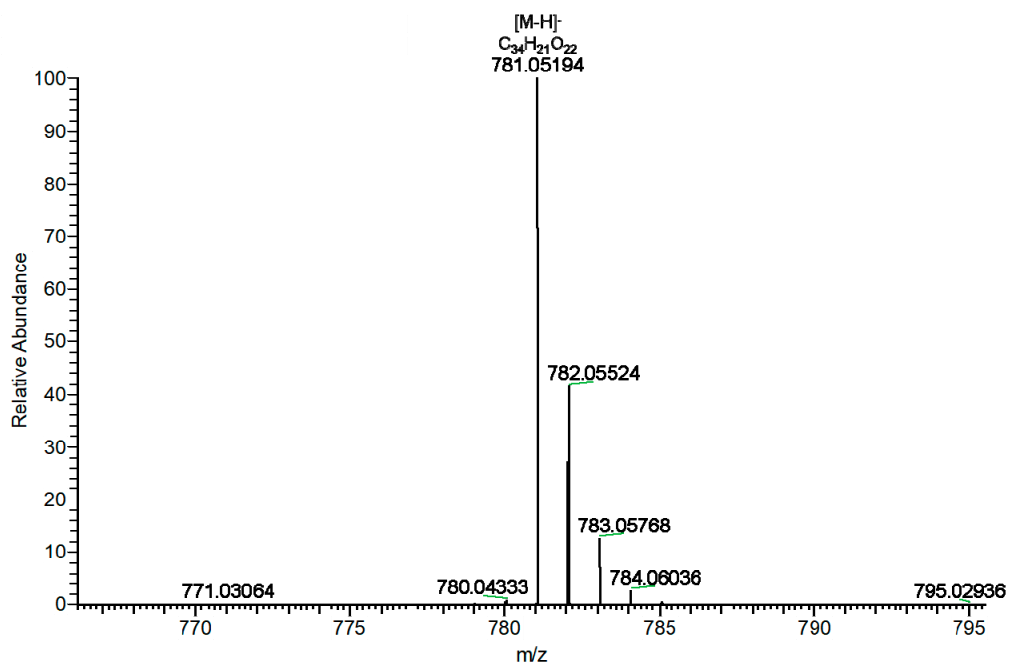

Figure S56. HRESIMS spectrum of 8



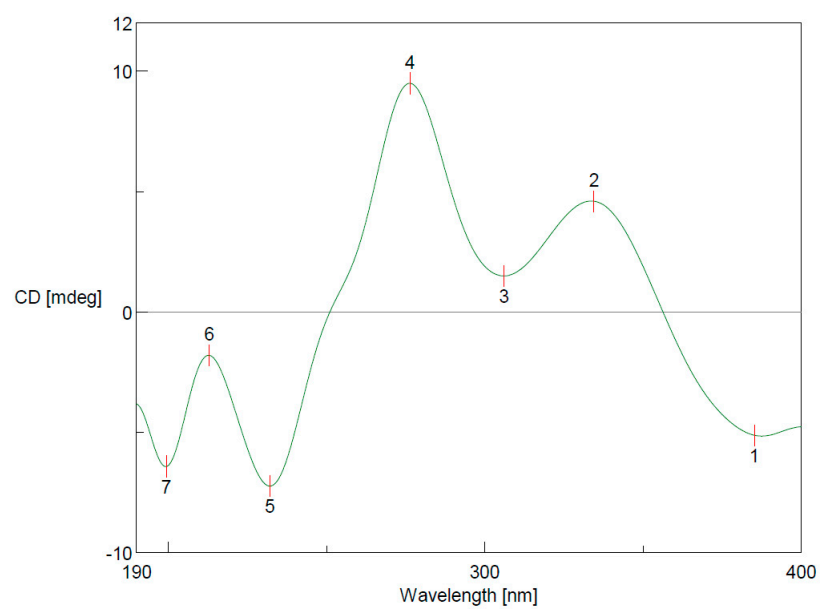

**Figure S57.** The experimental ECD spectrum of compound **8** in MeOH

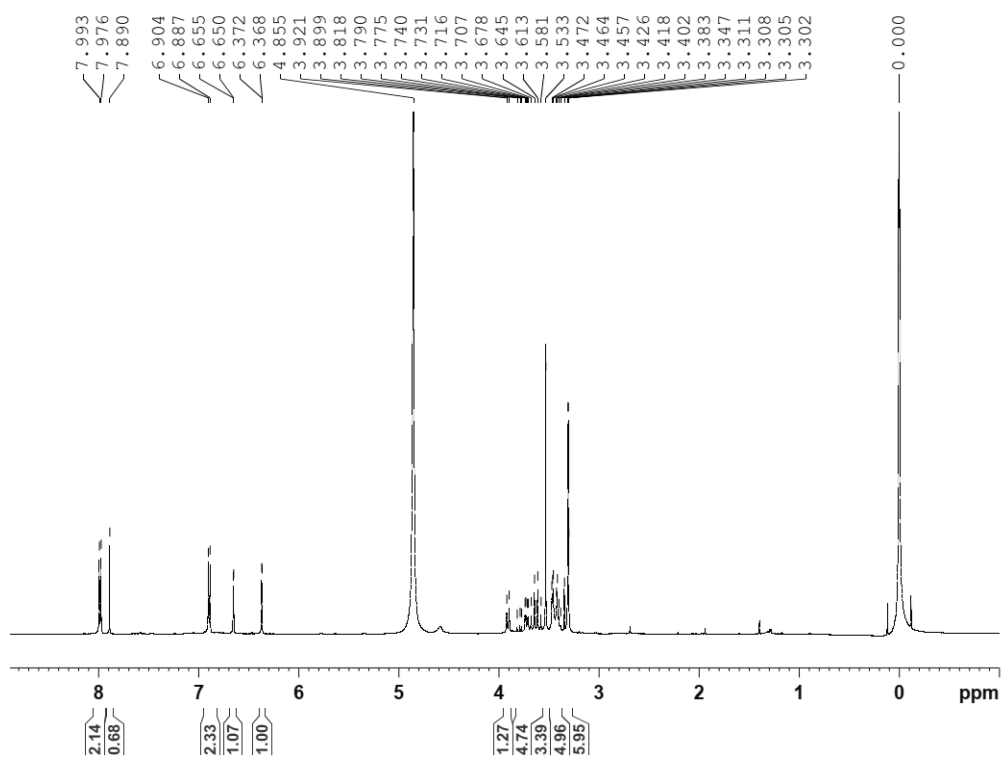

Figure S58.  $^1\text{H}$  NMR (500 MHz,  $\text{CD}_3\text{OD}$ ) spectrum of **9**

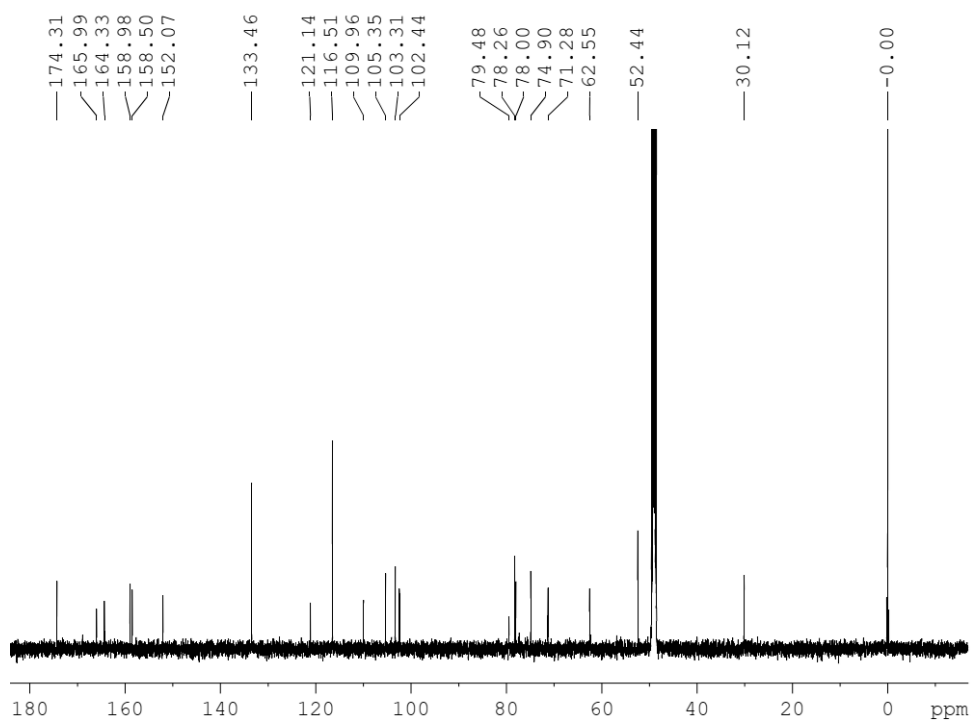

Figure S59.  $^{13}\text{C}$  NMR (125 MHz,  $\text{CD}_3\text{OD}$ ) spectrum of **9**

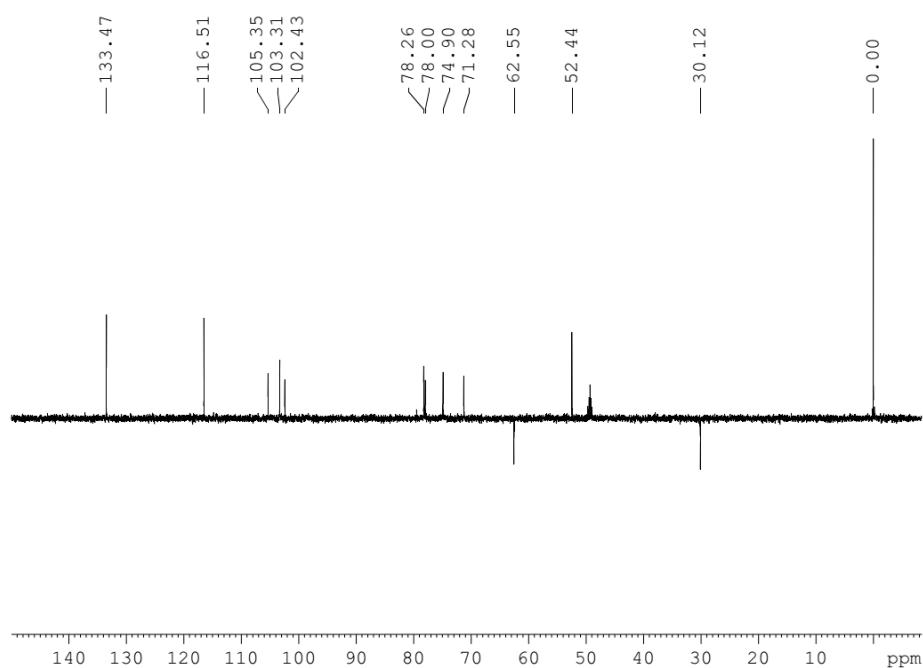

**Figure S60.** DEPT (125 MHz, CD<sub>3</sub>OD) spectrum of **9**

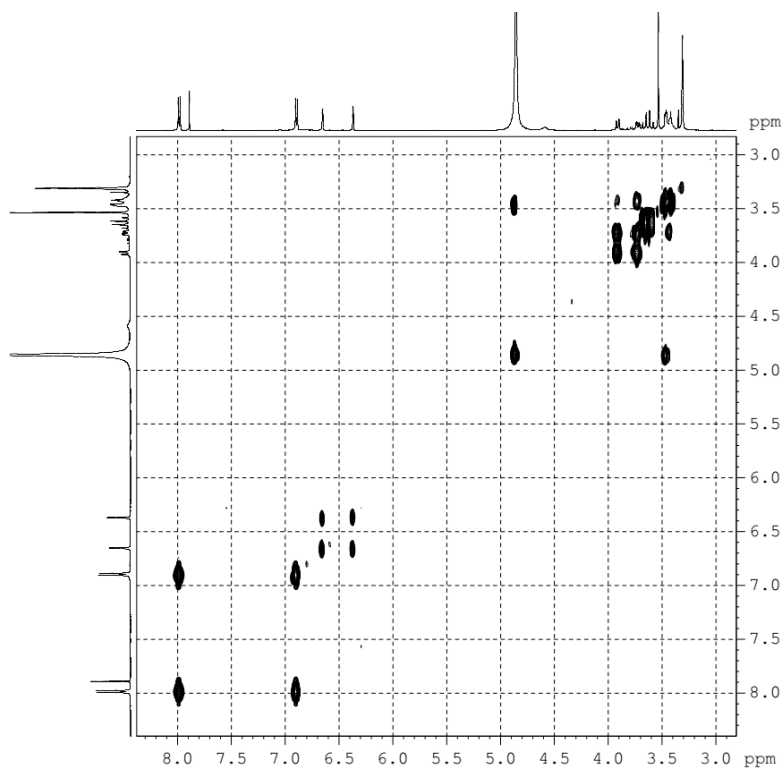

**Figure S61.** <sup>1</sup>H-<sup>1</sup>H COSY (CD<sub>3</sub>OD) spectrum of **9**

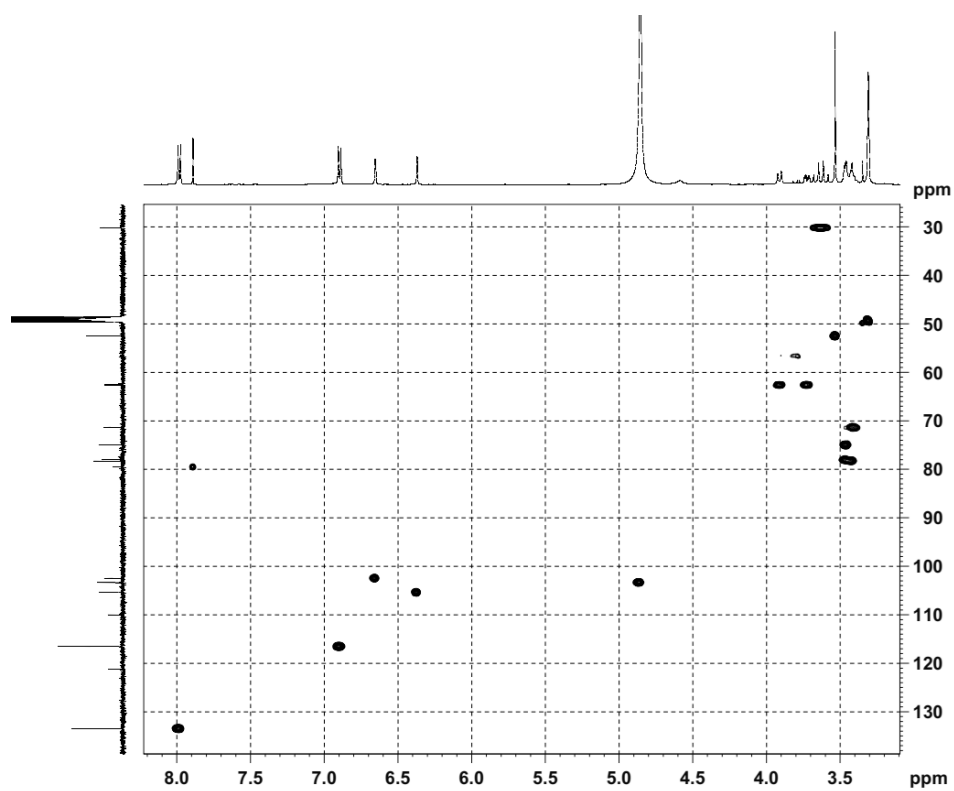

Figure S62. HSQC (CD<sub>3</sub>OD) spectrum of **9**

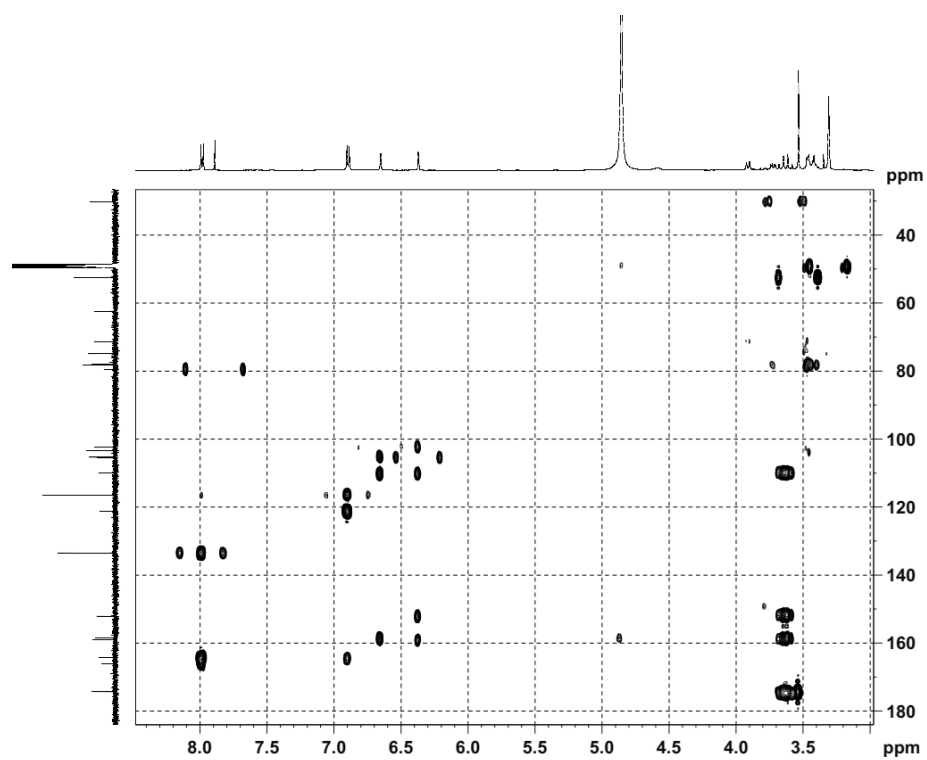

Figure S63. HMBC (CD<sub>3</sub>OD) spectrum of **9**

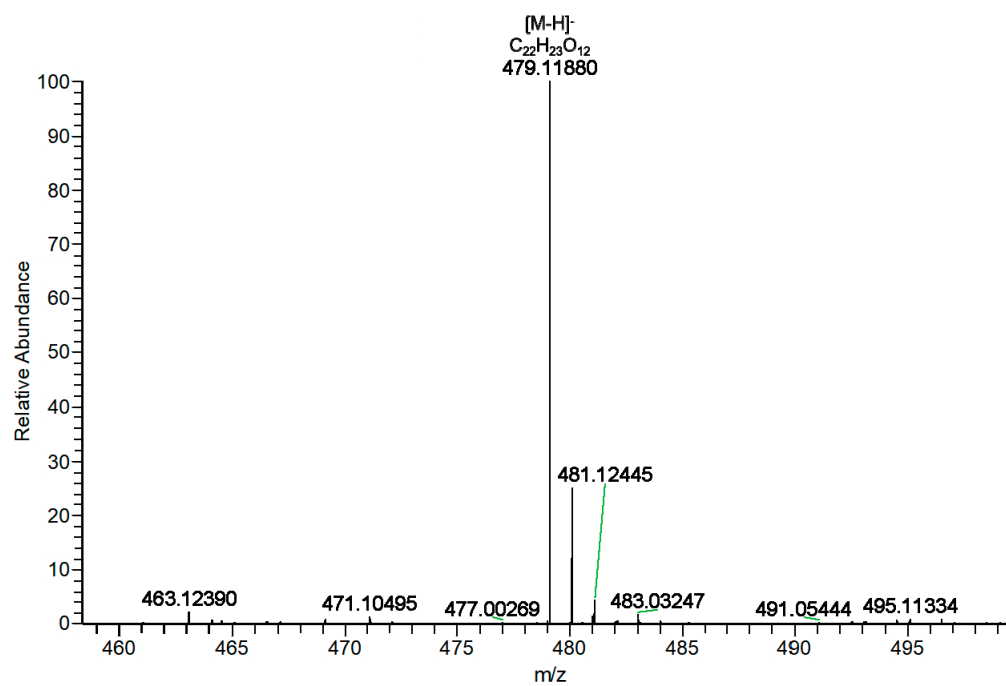

Figure S64. HRESIMS spectrum of 9

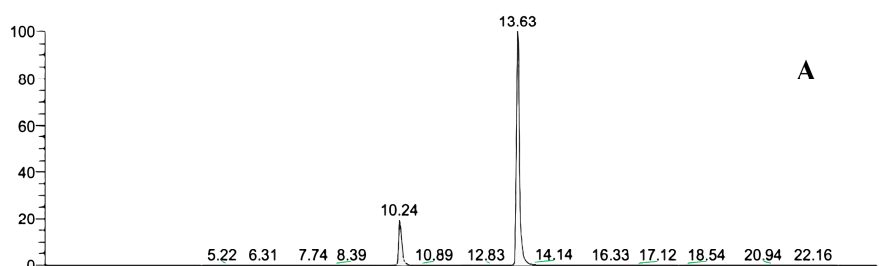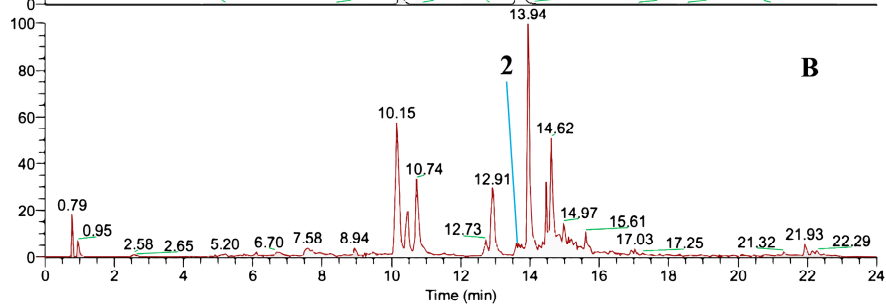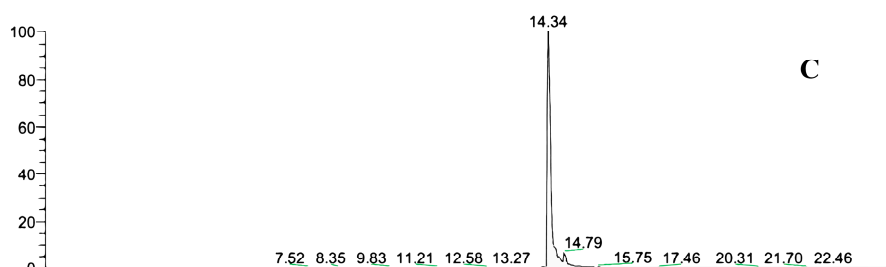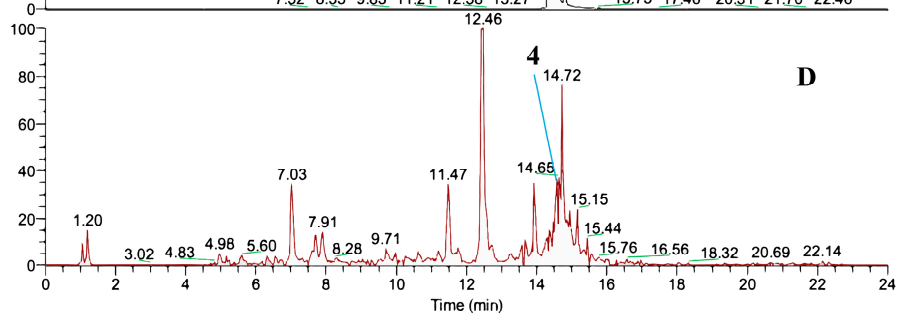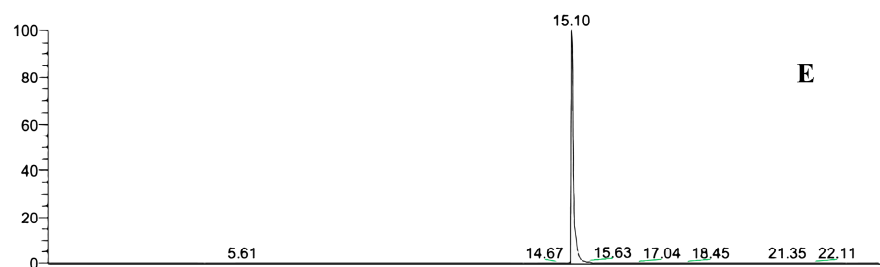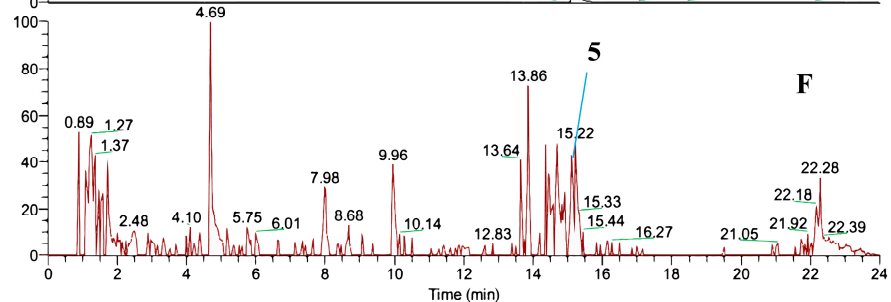

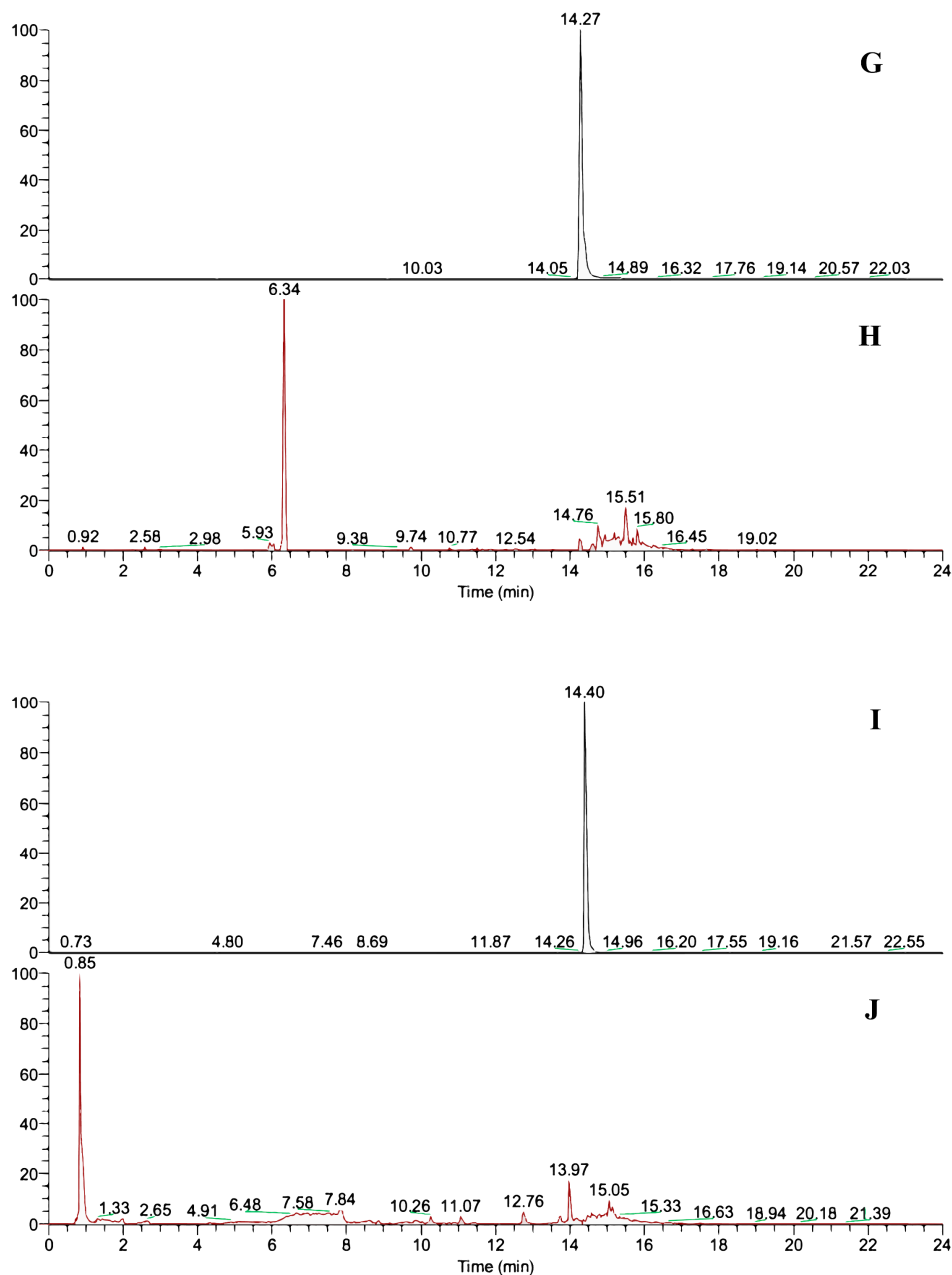

**Figure S65.** The LC-MS analysis of compounds **2**, **4**, **5**, **6** and **9** from *P. granatum* peels

A: The BPC for compound **2** ( $m/z$  293.0305); B: The EIC of  $m/z$  293.0305 from the 70% EtOH extract of *P. granatum* peels; C: The BPC for compound **4** ( $m/z$  335.0400); D: The EIC of  $m/z$  335.0400 from the 70% MeOH extract of *P. granatum* peels; E: The BPC for compound **5** ( $m/z$  263.0561); F: The EIC of  $m/z$  263.0561 from the 70% MeOH extract of *P. granatum* peels; G: The BPC for compound **6** ( $m/z$  497.0388); H: The EIC of  $m/z$  497.0388 from the 70% MeOH extract of *P. granatum* peels; I: The BPC for compound **9** ( $m/z$  479.1211); J: The EIC of  $m/z$  479.1211 from the 70% EtOH extract of *P. granatum* peels.

Chromatographic conditions: Column: ACQUITY UPLC CSH C18 (1.7  $\mu$ m, 2.1  $\times$  100 mm) ; mobile phase: A: H<sub>2</sub>O; B: CH<sub>3</sub>CN; gradient elution conditions: 0–2 min, 1% B, 2–3 min, 1%–5% B, 3–12 min, 5%–13% B, 12–13 min, 13%–25% B, 13–14 min, 25%–50% B, 14–22 min, 50%–100% B, 22–24 min, 100% B; column temperature: 35°C; flow rate: 0.3 mL/min; injection volume: 2  $\mu$ L.

Mass spectrometry conditions: Ion source: heat electrospray ion source (HESI source); capillary voltage: 3.2 kV; capillary temperature: 350°C; ion source temperature: 320°C; sheath gas (N<sub>2</sub>): 40 L/h; auxiliary gas (N<sub>2</sub>): 10 L/h; normalized collision energy (NCE): 35 V; scan mode: target sim; scan range: 100–1500 *m/z*; detection time: 24 min; ESI acquisition mode: negative ion mode.



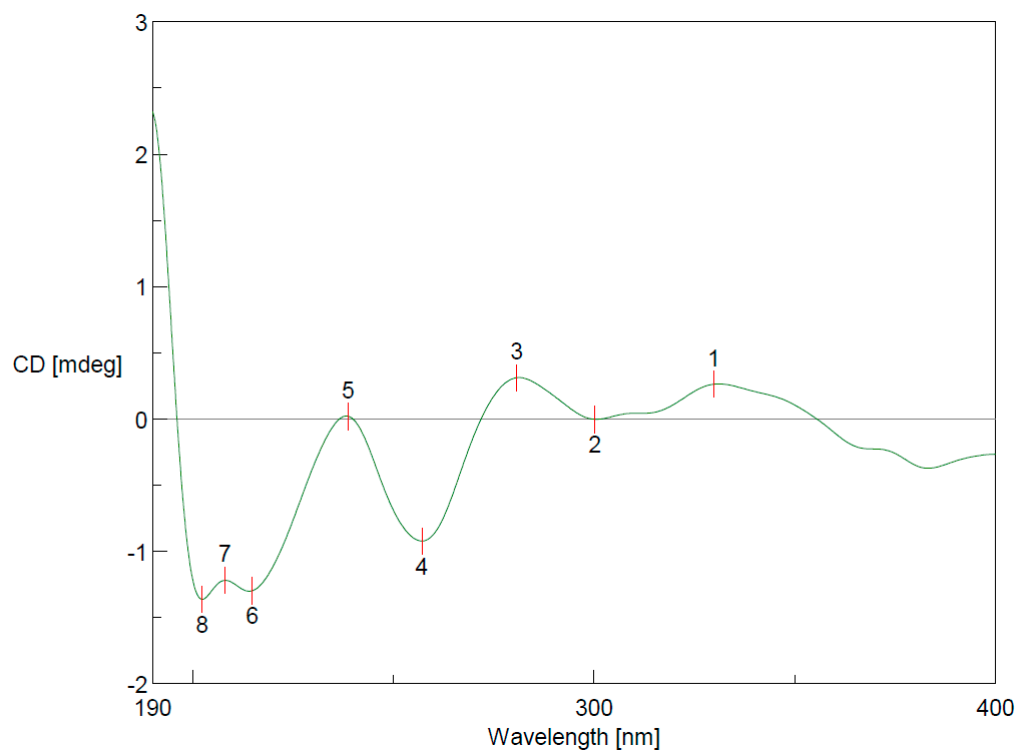

**Figure S66.** The experimental ECD spectrum of compound **14** in MeOH

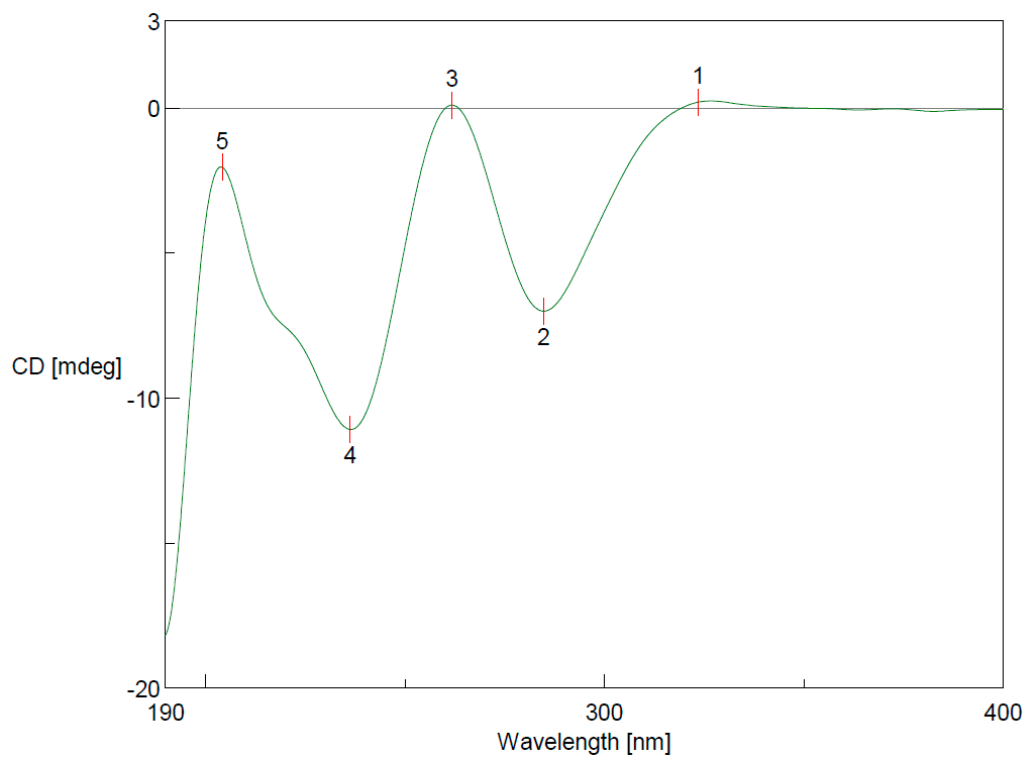

**Figure S67.** The experimental ECD spectrum of compound **16** in MeOH

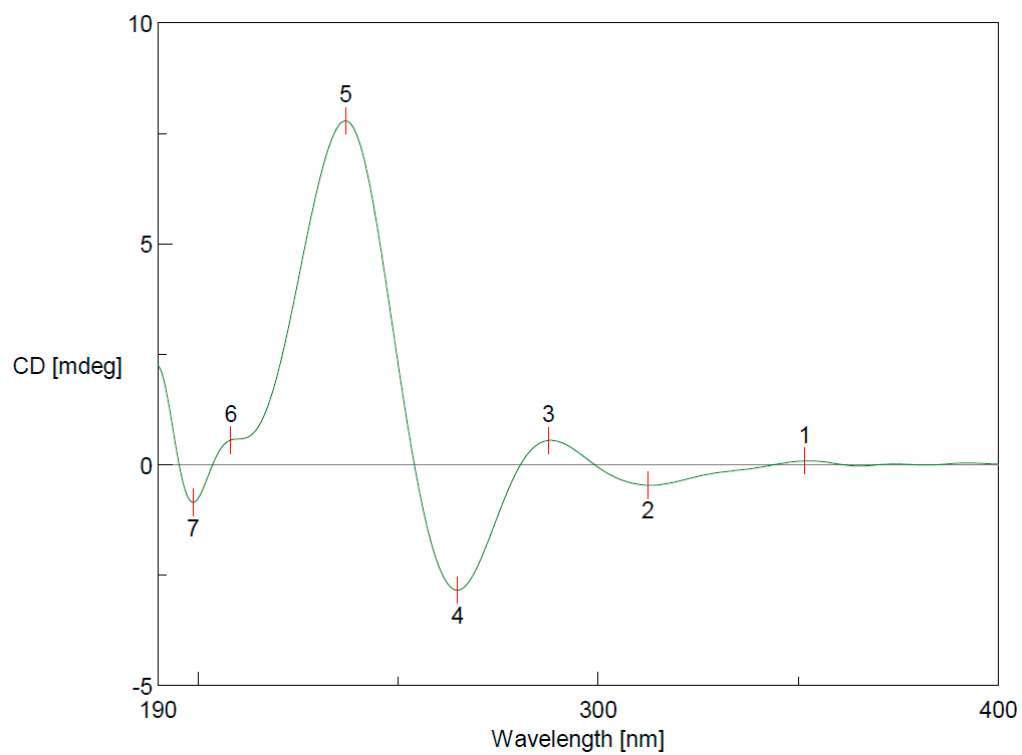

**Figure S68.** The experimental ECD spectrum of compound 17 in MeOH

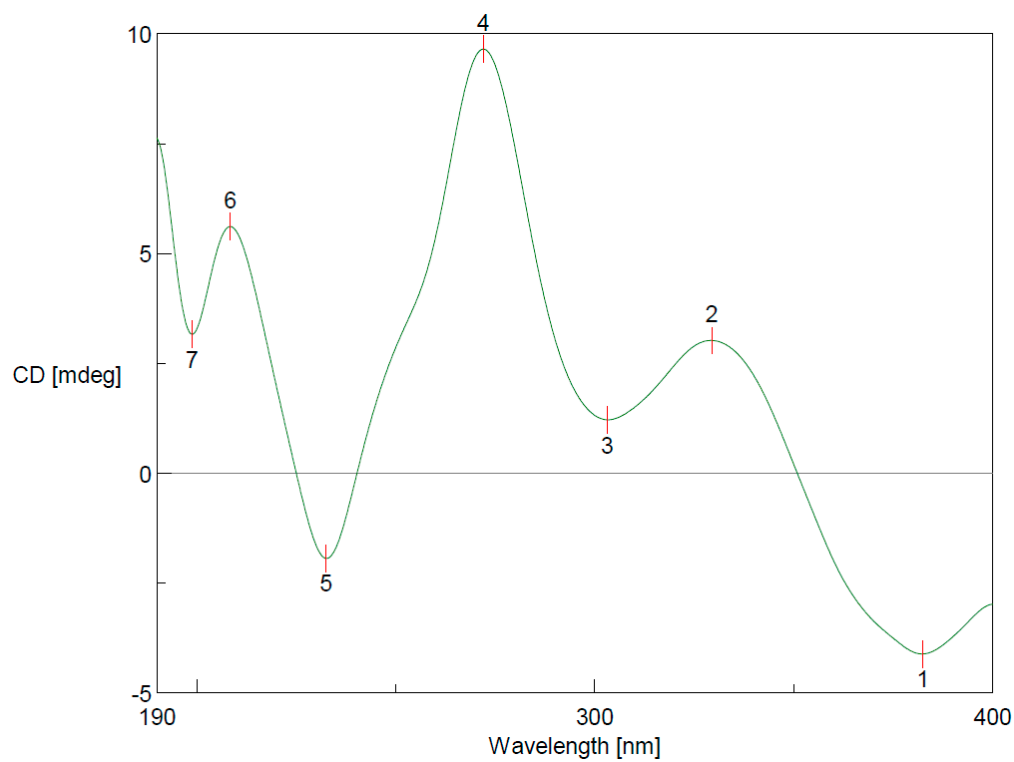

**Figure S69.** The experimental ECD spectrum of compound 18 in MeOH

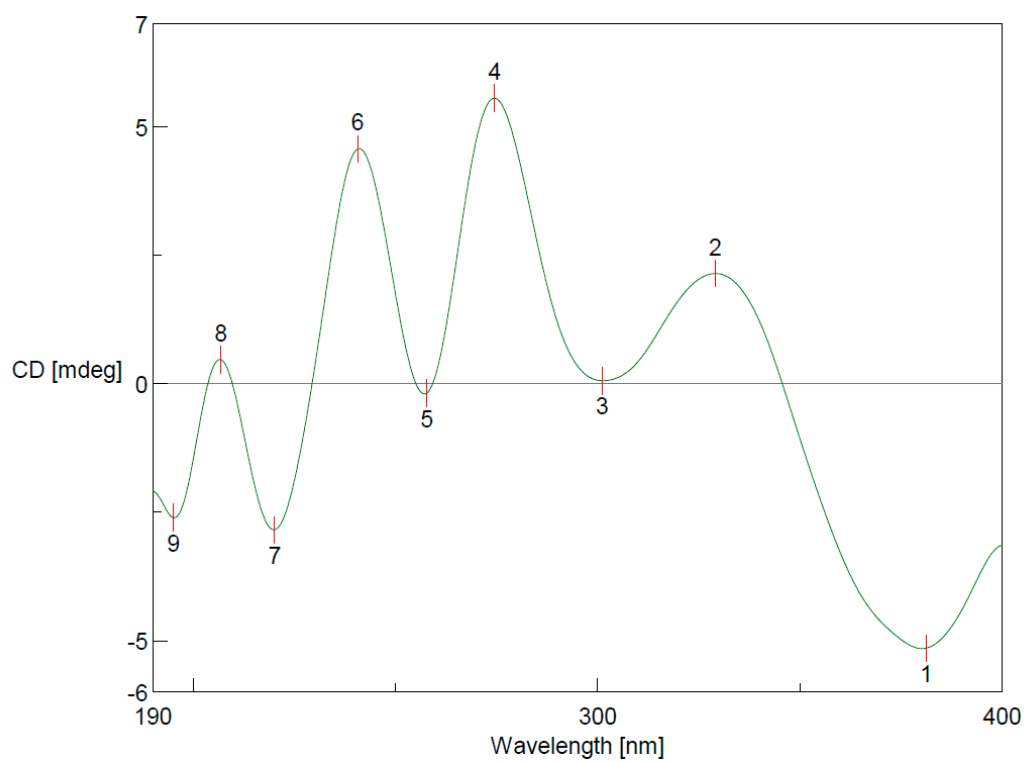

**Figure S70.** The experimental ECD spectrum of compound **19** in MeOH

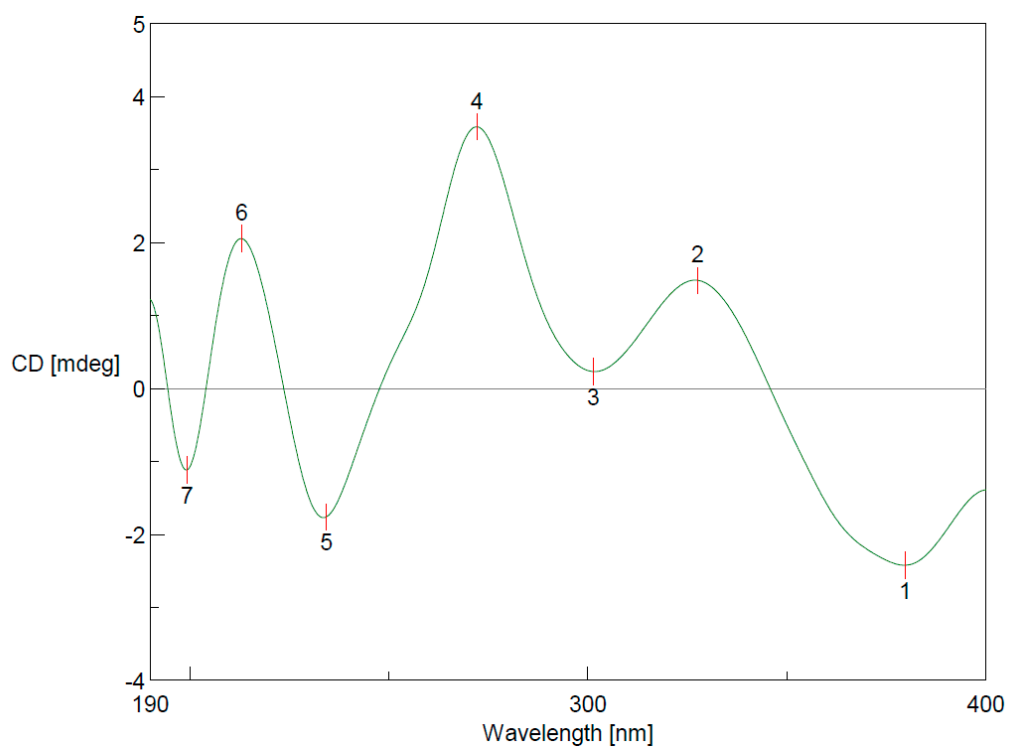

**Figure S71.** The experimental ECD spectrum of compound **20** in MeOH

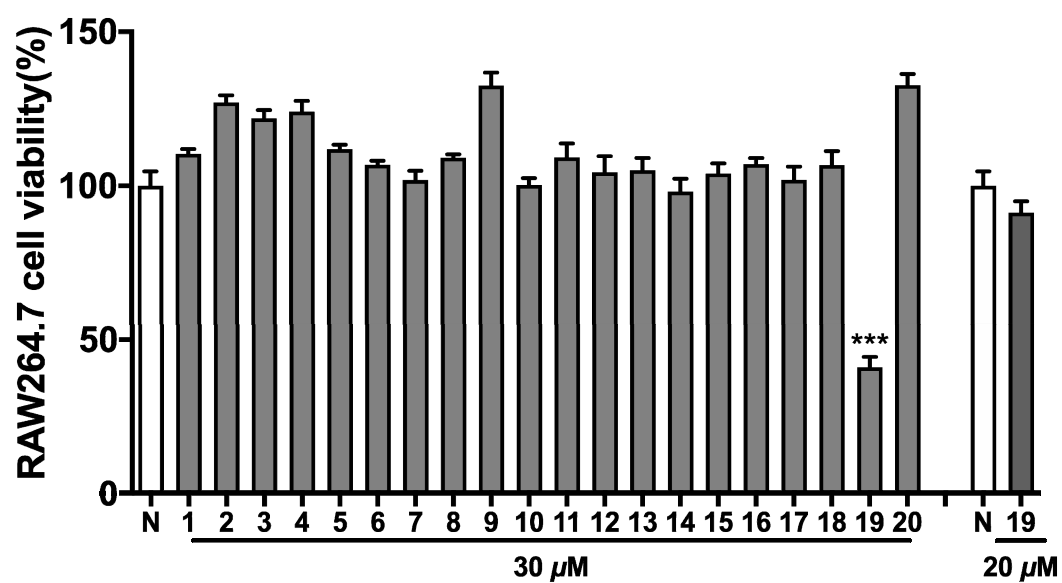

**Figure S72.** The MTT assay of compounds 1–18, 20 at 30  $\mu$ M and 19 at 20  $\mu$ M

N: normal group. Values represent the mean  $\pm$  SD of six determinations. \*\*\* $P < 0.001$  (Differences between compound-treated group and normal group).

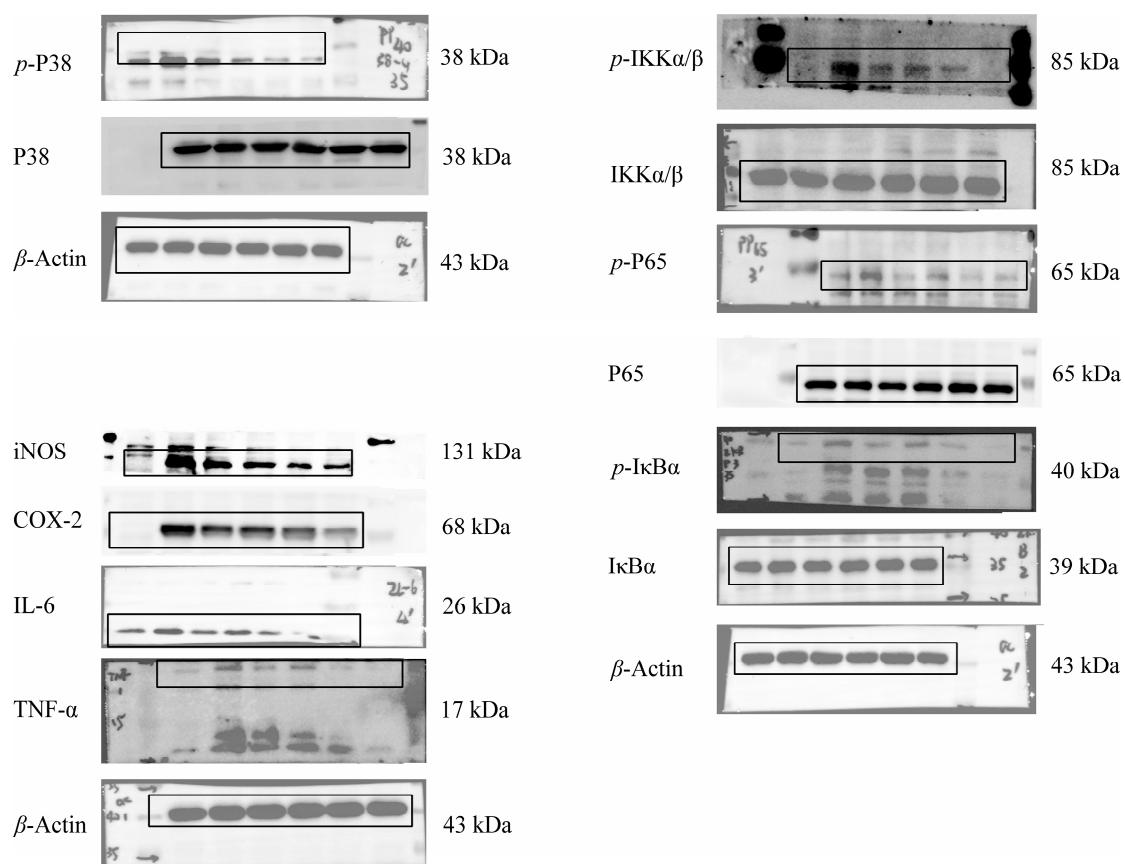

**Figure S73.** The raw data of Figure 4

## Physical and chemical data of compounds 10–20

Brevifolin (**10**): yellow powder;  $^1\text{H}$  NMR (DMSO- $d_6$ , 500 MHz):  $\delta$  7.29 (1H, s, H-7), 2.51 (2H, t,  $J$  = 4.0 Hz, H<sub>2</sub>-9), 3.18 (2H, t,  $J$  = 4.0 Hz, H<sub>2</sub>-10);  $^{13}\text{C}$  NMR (DMSO- $d_6$ , 125 MHz):  $\delta$  141.4 (C-2), 144.9 (C-3), 115.4 (C-3a), 144.1 (C-4), 140.0 (C-5), 149.2 (C-6), 107.9 (C-7), 113.2 (C-7a), 160.5 (C-8), 23.8 (C-9), 32.9 (C-10), 195.3 (C-11); HRESIMS:  $m/z$  247.0254 [ $\text{M}-\text{H}$ ] $^-$  (calcd for  $\text{C}_{12}\text{H}_7\text{O}_6$ , 247.0248).

Brevifolincarboxylic acid (**11**): yellow powder;  $^1\text{H}$  NMR (DMSO- $d_6$ , 400 MHz):  $\delta$  7.24 (1H, s, H-7), 4.37 (1H, d,  $J$  = 7.2 Hz, H-9), [2.63 (1H, d,  $J$  = 18.4 Hz), 2.83 (1H, dd,  $J$  = 7.2, 18.4 Hz), H<sub>2</sub>-10];  $^{13}\text{C}$  NMR (DMSO- $d_6$ , 100 MHz):  $\delta$  141.0 (C-2), 145.3 (C-3), 115.2 (C-3a), 144.7 (C-4), 139.7 (C-5), 149.1 (C-6), 107.9 (C-7), 112.8 (C-7a), 160.4 (C-8), 41.3 (C-9), 37.3 (C-10), 193.8 (C-11), 173.1 (COOH); HRESIMS:  $m/z$  291.0150 [ $\text{M}-\text{H}$ ] $^-$  (calcd for  $\text{C}_{13}\text{H}_7\text{O}_8$ , 291.0146).

4- $O$ - $\alpha$ -L-Rhamnopyranosyl ellagic acid (**12**): white powder;  $^1\text{H}$  NMR (DMSO- $d_6$ , 500 MHz):  $\delta$  7.73 (1H, s, H-5), 7.46 (1H, br. s, H-5'), 5.47 (1H, br. s, H-1''), 4.02 (1H, br. d, ca.  $J$  = 3 Hz, H-2''), 3.86 (1H, dd,  $J$  = 3.09.0 Hz, H-3''), 3.34 (1H, dd,  $J$  = 9.09.0 Hz, H-4''), 3.58 (1H, m, H-5''), 1.15 (3H, d,  $J$  = 6.5 Hz, H<sub>3</sub>-6'');  $^{13}\text{C}$  NMR (DMSO- $d_6$ , 125 MHz):  $\delta$  114.6 (C-1), 136.4 (C-2), 142.0 (C-3), 146.4 (C-4), 111.6 (C-5), 106.7 (C-6), 159.0 (C-7), 107.0 (C-1'), 136.5 (C-2'), 140.9 (C-3'), 148.9 (C-4'), 109.8 (C-5'), 111.9 (C-6'), 159.2 (C-7'), 100.0 (C-1''), 69.8 (C-2''), 70.0 (C-3''), 71.7 (C-4''), 69.8 (C-5''), 17.8 (C-6''); HRESIMS:  $m/z$  447.0576 [ $\text{M}-\text{H}$ ] $^-$  (calcd for  $\text{C}_{20}\text{H}_{15}\text{O}_{12}$ , 447.0569).

4- $O$ - $\beta$ -D-Glucopyranosyl-3,3'-di- $O$ -methylellagic acid (**13**): white powder;  $^1\text{H}$  NMR ( $\text{C}_5\text{D}_5\text{N}$ , 500 MHz):  $\delta$  8.45 (1H, s, H-5), 8.05 (1H, s, H-5'), 5.89 (1H, d,  $J$  = 7.5 Hz, H-1''), 4.41 (1H, dd,  $J$  = 9.0, 9.0 Hz, H-2''), 4.41 (1H, dd,  $J$  = 9.0, 9.0 Hz, H-3''), 4.38 (1H, dd,  $J$  = 9.0, 9.0 Hz, H-4''), 4.18 (1H, m, H-5''), [4.42 (1H, m), 4.60 (1H, dd,  $J$  = 2.0, 12.0 Hz), H<sub>2</sub>-6''], 4.27 (3H, s, 3-OCH<sub>3</sub>), 4.20 (3H, s, 3'-OCH<sub>3</sub>);  $^{13}\text{C}$  NMR ( $\text{C}_5\text{D}_5\text{N}$ , 125 MHz):  $\delta$  114.9 (C-1), 142.4 (C-2), 142.9 (C-3), 152.6 (C-4), 113.2 (C-5), 112.9 (C-6), 159.2 (C-7), 111.7 (C-1'), 141.9 (C-2'), 142.9 (C-3'), 154.5 (C-4'), 113.1 (C-5'), 113.9 (C-6'), 159.1 (C-7'), 103.0 (C-1''), 74.9 (C-2''), 78.5 (C-3''), 71.1 (C-4''), 79.2 (C-5''), 62.4 (C-6''), 62.0 (3-OCH<sub>3</sub>), 61.4 (3'-OCH<sub>3</sub>); HRESIMS:  $m/z$  491.0845 [ $\text{M}-\text{H}$ ] $^-$  (calcd for  $\text{C}_{22}\text{H}_{19}\text{O}_{13}$ , 491.0831).

(*S*)-flavogallonic acid (**14**): white powder;  $[\alpha]_D^{25}$  -10.0 ( $c$  0.06, MeOH); CD ( $c$  0.00021 M, MeOH) mdeg ( $\lambda$ nm): +0.02 (238), -0.92 (257), +0.31 (281), -0.00 (300), +0.26 (329);  $^1\text{H}$  NMR ( $\text{CD}_3\text{OD}$ , 500 MHz):  $\delta$  7.40 (1H, br. s, H-5), 7.31 (1H, s, H-6'');  $^{13}\text{C}$ -NMR ( $\text{CD}_3\text{OD}$ , 125 MHz):  $\delta$  114.5 (C-1), 137.6 (C-2)<sup>a</sup>, 140.4 (C-3), 149.0 (C-4), 111.3 (C-5), 108.9 (C-6)<sup>b</sup>, 161.6 (C-7), 114.1 (C-1'), 136.9 (C-2')<sup>a</sup>, 140.1 (C-3'), 147.3 (C-4'), 109.2 (C-5')<sup>b</sup>, 121.4 (C-6'), 160.2 (C-7'), 126.0 (C-1''), 119.1 (C-2''), 144.4 (C-3''), 139.1 (C-4''), 145.4 (C-5''), 111.8 (C-6''), 170.4 (C-7'') (the data of <sup>a</sup>C-2 and C-2', <sup>b</sup>C-6 and C-5' maybe exchanged); HRESIMS:  $m/z$  469.0062 [ $\text{M}-\text{H}$ ] $^-$  (calcd for  $\text{C}_{21}\text{H}_9\text{O}_{13}$ , 469.0049).

Valoneic acid dilactone (**15**): white powder;  $^1\text{H}$  NMR (DMSO- $d_6$ , 500 MHz):  $\delta$  7.54 (1H, s, H-5), 7.01 (1H, s, H-5'), 7.04 (1H, s, H-6'');  $^{13}\text{C}$  NMR (DMSO- $d_6$ , 125 MHz):  $\delta$  111.9 (C-1), 139.4 (C-2)<sup>a</sup>, 139.6 (C-3), 148.5 (C-4), 110.3 (C-5), 108.0 (C-6), 159.2 (C-7), 113.9 (C-1'), 136.2 (C-2')<sup>a</sup>, 141.1 (C-3'), 149.4 (C-4'), 108.6 (C-5'), 106.4 (C-6'), 159.1 (C-7'), 114.6 (C-1''), 139.1 (C-2''), 136.5 (C-3'')<sup>a</sup>, 135.2 (C-4''), 142.8 (C-5''), 108.2 (C-6''), 166.0 (C-7'') (the data of C-2 and C-3' maybe exchanged); HRESIMS:  $m/z$  469.0062 [ $\text{M}-\text{H}$ ] $^-$  (calcd for  $\text{C}_{21}\text{H}_9\text{O}_{13}$ , 469.0049).

Corilagin (**16**): white powder; CD ( $c$  0.00016 M, MeOH) mdeg ( $\lambda$ nm): -11.1 (236), +0.09 (262), -7.01 (285), +0.19 (324);  $^1\text{H}$  NMR ( $\text{CD}_3\text{OD}$ , 500 MHz):  $\delta$  6.37 (1H, br. s, H-1), 3.99 (1H, br. s, H-2), 4.81 (1H, br. s, H-3), 4.47 (1H, br. s, H-4), 4.52 (1H, dd,  $J$  = 8.5, 11.0 Hz, H-5), [4.15 (1H, dd,  $J$  = 8.5, 11.0 Hz), 4.98 (1H, dd,  $J$  = 11.0, 11.0 Hz), H<sub>2</sub>-6], 7.05 (2H, s, H-2',6'), 6.69 (1H, s, H-5''), 6.66 (1H, s, H-5''');  $^{13}\text{C}$  NMR ( $\text{CD}_3\text{OD}$ , 125 MHz):  $\delta$  95.0 (C-1), 69.3 (C-2), 71.3 (C-3), 62.4 (C-4), 76.1 (C-5), 65.2 (C-6), 120.6 (C-1'), 111.0 (C-2',6'), 146.3 (C-3',5'), 140.4 (C-4'), 166.6 (C-7'), 117.1 (C-1''), 145.2 (C-2''), 138.2 (C-3''), 145.6 (C-4''), 110.2 (C-5''), 125.4 (C-6''), 168.5 (C-7''), 116.6 (C-1'''), 145.1 (C-2'''), 137.6 (C-3'''), 145.9 (C-4'''), 108.3 (C-5'''), 125.5 (C-6'''), 170.1 (C-7'''); HRESIMS:  $m/z$  633.0704 [ $\text{M}-\text{H}$ ] $^-$  (calcd for  $\text{C}_{27}\text{H}_{21}\text{O}_{18}$ , 633.0733).

2,3-(*S*)-Hexahydroxydiphenoyl-D-glucose (**17**) ( $1\alpha:1\beta \approx 7:8$ ): white powder; CD ( $c$  0.00021 M, MeOH) mdeg ( $\lambda$ nm): +7.78 (237), -2.84 (265), +0.55 (288), -0.47 (312), +0.08 (352);  $^1\text{H}$  NMR (Acetone- $d_6$ :D<sub>2</sub>O, 9:1, 400 MHz):  $\delta$  5.42 (1H, d,  $J$  = 3.6 Hz, Glc-H-1 $\alpha$ ), 4.93 (1H, dd,  $J$  = 3.6, 9.6 Hz, Glc-H-2 $\alpha$ ), 5.36 (1H, dd,  $J$  = 9.6, 9.6 Hz, Glc-H-3 $\alpha$ ), 3.80 (1H, dd,  $J$  = 9.6, 9.6 Hz, Glc-H-4 $\alpha$ ), 3.95 (1H, m, Glc-H-5 $\alpha$ ), 3.82–3.96 (2H, m, Glc-H<sub>2</sub>-6 $\alpha$ ), 6.67 (1H, s, H-5' $\alpha$ ), 6.77 (1H, s, H-5'' $\alpha$ ); 5.00 (1H, d,  $J$  = 8.0 Hz,

Glc-H-1 $\beta$ ), 4.73 (1H, dd,  $J$  = 8.0, 9.6 Hz, Glc-H-2 $\beta$ ), 5.03 (1H, dd,  $J$  = 9.6, 9.6 Hz, Glc-H-3 $\beta$ ), 3.76 (1H, dd,  $J$  = 9.6, 9.6 Hz, Glc-H-4 $\beta$ ), 3.56 (1H, m, Glc-H-5 $\beta$ ), 3.82–3.96 (2H, m, Glc-H-6 $\beta$ ), 6.67 (1H, s, H-5' $\beta$ ), 6.75 (1H, s, H-5'' $\beta$ );  $^{13}\text{C}$  NMR (Acetone- $d_6$ :D $_2$ O, 9:1, 100 MHz):  $\delta$  91.2 (Glc-C-1 $\alpha$ ), 75.5 (Glc-C-2 $\alpha$ ), 78.2 (Glc-C-3 $\alpha$ ), 68.2 (Glc-C-4 $\alpha$ ), 72.9 (Glc-C-5 $\alpha$ ), 61.7 (Glc-C-6 $\alpha$ ), 114.7 (C-1' $\alpha$ ), 144.3 (C-2' $\alpha$ )<sup>a</sup>, 136.2 (C-3' $\alpha$ ), 145.2 (C-4' $\alpha$ ), 107.4 (C-5' $\alpha$ ), 126.6 (C-6' $\alpha$ )<sup>b</sup>, 169.7 (C-7' $\alpha$ ), 114.5 (C-1'' $\alpha$ ), 144.3 (C-2'' $\alpha$ )<sup>a</sup>, 136.1 (C-3'' $\alpha$ ), 145.2 (C-4'' $\alpha$ ), 107.6 (C-5'' $\alpha$ ), 126.6 (C-6'' $\alpha$ )<sup>b</sup>, 170.2 (C-7'' $\alpha$ ) (the data of <sup>a</sup>C-2' $\alpha$  and C-2'' $\alpha$ ; <sup>b</sup>C-6' $\alpha$  and C-6'' $\alpha$  maybe exchanged); 94.5 (Glc-C-1 $\beta$ ), 77.8 (Glc-C-2 $\beta$ ), 80.5 (Glc-C-3 $\beta$ ), 67.9 (Glc-C-4 $\beta$ ), 77.7 (Glc-C-5 $\beta$ ), 61.7 (Glc-C-6 $\beta$ ), 114.7 (C-1' $\beta$ ), 144.2 (C-2' $\beta$ )<sup>a</sup>, 136.3 (C-3' $\beta$ ), 145.2 (C-4' $\beta$ ), 107.4 (C-5' $\beta$ ), 126.9 (C-6' $\beta$ )<sup>b</sup>, 169.6 (C-7' $\beta$ ), 114.6 (C-1'' $\beta$ ), 144.4 (C-2'' $\beta$ )<sup>a</sup>, 136.1 (C-3'' $\beta$ ), 145.2 (C-4'' $\beta$ ), 107.6 (C-5'' $\beta$ ), 127.1 (C-6'' $\beta$ )<sup>b</sup>, 170.2 (C-7'' $\beta$ ) (the data of <sup>a</sup>C-2' $\alpha$  and C-2'' $\alpha$ ; <sup>b</sup>C-6' $\alpha$  and C-6'' $\alpha$  maybe exchanged); HRESIMS:  $m/z$  481.0624 [M–H]<sup>–</sup> (calcd for C $_{20}$ H $_{17}$ O $_{14}$ , 481.0624).

Punicalin (**18**) (1 $\alpha$ :1 $\beta$   $\approx$  1:1): pale yellow powder; CD ( $c$  0.00013 M, MeOH) mdeg ( $\lambda$ nm): –1.93 (233), +9.64 (272), +1.21 (303), +3.02 (329), –4.11 (383);  $^1\text{H}$  NMR (Acetone- $d_6$ :D $_2$ O, 9:1, 400 MHz):  $\delta$  4.87 (1H, d,  $J$  = 2.8 Hz, Glc-H-1 $\alpha$ ), 3.36 (1H, dd,  $J$  = 2.8, 7.6 Hz, Glc-H-2 $\alpha$ ), 3.81 (1H, dd,  $J$  = 7.6, 7.6 Hz, Glc-H-3 $\alpha$ ), 4.26 (1H, dd,  $J$  = 7.6, 7.6 Hz, Glc-H-4 $\alpha$ ), 2.87 (1H, m, Glc-H-5 $\alpha$ ), [2.59 (1H, br. d,  $ca.$   $J$  = 11 Hz), 4.08 (1H, dd,  $J$  = 11.2, 11.2 Hz), Glc-H-6 $\alpha$ ], 6.76 (1H, s, gallagyl-H-4 $\alpha$ ), 7.07 (1H, s, gallagyl-H-6 $\alpha$ ); 4.34 (1H, d,  $J$  = 8.8 Hz, Glc-H-1 $\beta$ ), 3.21 (1H, dd,  $J$  = 8.8, 8.8 Hz, Glc-H-2 $\beta$ ), 3.47 (1H, dd,  $J$  = 8.8, 8.8 Hz, Glc-H-3 $\beta$ ), 4.39 (1H, dd,  $J$  = 8.8, 8.8 Hz, Glc-H-4 $\beta$ ), 2.46 (1H, m, Glc-H-5 $\beta$ ), [2.35 (1H, br. d,  $ca.$   $J$  = 11 Hz), 3.97 (1H, dd,  $J$  = 10.8, 10.8 Hz), Glc-H-6 $\beta$ ], 6.75 (1H, s, gallagyl-H-4 $\beta$ ), 7.03 (1H, s, gallagyl-H-6 $\beta$ );  $^{13}\text{C}$  NMR (Acetone- $d_6$ :D $_2$ O, 9:1, 100 MHz):  $\delta$  90.0 (Glc-C-1 $\alpha$ ), 71.8 (Glc-C-2 $\alpha$ ), 70.1 (Glc-C-3 $\alpha$ ), 73.4 (Glc-C-4 $\alpha$ ), 70.8 (Glc-C-5 $\alpha$ ), 64.1 (Glc-C-6 $\alpha$ ); 96.9 (Glc-C-1 $\beta$ ), 75.1 (Glc-C-2 $\beta$ ), 75.5 (Glc-C-3 $\beta$ ), 74.0 (Glc-C-4 $\beta$ ), 72.7 (Glc-C-5 $\beta$ ), 65.2 (Glc-C-6 $\beta$ ); gallagyl part: 109.8 (gallagyl-C-4 $\alpha$ ), 110.0, 110.0, 110.1 (gallagyl-C-4 $\beta$ ), 110.2, 110.4, 111.69 (gallagyl-C-6 $\beta$ ), 111.74 (gallagyl-C-6 $\alpha$ ), 114.2, 114.4, 114.6, 114.9, 115.0, 115.2, 117.9, 118.1, 122.3, 122.6, 122.8, 123.2, 125.0, 125.0, 125.1, 125.3, 136.3, 136.4, 136.59, 136.63, 137.1, 137.4, 137.9, 137.9, 139.1, 139.2, 140.3, 140.4, 144.1, 144.2, 144.5, 144.5, 145.4, 145.4, 145.5, 145.6, 147.6, 147.8, 147.9, 148.2, 159.2 (lactone carbonyl-C), 159.3 (lactone carbonyl-C), 159.7 (lactone carbonyl-C), 160.1 (lactone carbonyl-C), 168.8 (ester carbonyl-C-6 $\beta$ ), 168.8 (ester carbonyl-C-6 $\alpha$ ), 170.0 (ester carbonyl-C-4 $\alpha$ ), 170.0 (ester carbonyl-C-4 $\beta$ ).

$^1\text{H}$  NMR (CD $_3$ OD, 400 MHz):  $\delta$  4.84 (1H, d,  $J$  = 2.8 Hz, Glc-H-1 $\alpha$ ), 3.26 (1H, dd,  $J$  = 2.8, 8.4 Hz, Glc-H-2 $\alpha$ ), 3.65 (1H, dd,  $J$  = 8.0, 8.4 Hz, Glc-H-3 $\alpha$ ), 4.25 (1H, dd,  $J$  = 8.0, 8.0 Hz, Glc-H-4 $\alpha$ ), 2.95 (1H, m, Glc-H-5 $\alpha$ ), [2.31 (1H, br. d,  $ca.$   $J$  = 11 Hz), 3.99 (1H, dd,  $J$  = 10.8, 10.8 Hz), Glc-H-6 $\alpha$ ], 6.69 (1H, s, gallagyl-H-4 $\alpha$ ), 6.93 (1H, s, gallagyl-H-6 $\alpha$ ); 4.23 (1H, d,  $J$  = 7.6 Hz, Glc-H-1 $\beta$ ), 3.06 (1H, dd,  $J$  = 7.6, 8.8 Hz, Glc-H-2 $\beta$ ), 3.31 (1H, dd,  $J$  = 8.8, 8.8 Hz, Glc-H-3 $\beta$ ), 4.36 (1H, dd,  $J$  = 8.8, 8.8 Hz, Glc-H-4 $\beta$ ), 2.44 (1H, m, Glc-H-5 $\beta$ ), [2.20 (1H, br. d,  $ca.$   $J$  = 11 Hz), 3.92 (1H, dd,  $J$  = 10.8, 10.8 Hz), Glc-H-6 $\beta$ ], 6.69 (1H, s, gallagyl-H-4 $\beta$ ), 6.91 (1H, s, gallagyl-H-6 $\beta$ );  $^{13}\text{C}$  NMR (CD $_3$ OD, 100 MHz):  $\delta$  91.7 (Glc-C-1 $\alpha$ ), 72.9 (Glc-C-2 $\alpha$ ), 69.2 (Glc-C-3 $\alpha$ ), 74.4 (Glc-C-4 $\alpha$ ), 72.5 (Glc-C-5 $\alpha$ ), 64.9 (Glc-C-6 $\alpha$ ), 97.7 (Glc-C-1 $\beta$ ), 75.9 (Glc-C-2 $\beta$ ), 76.7 (Glc-C-3 $\beta$ ), 74.4 (Glc-C-4 $\beta$ ), 73.1 (Glc-C-5 $\beta$ ), 65.4 (Glc-C-6 $\beta$ ); gallagyl part:  $\delta$  110.1 (gallagyl-C-4 $\alpha$ ), 110.3 (gallagyl-C-4 $\beta$ ), 110.5, 110.5, 110.8, 110.9, 111.9 (gallagyl-C-6 $\beta$ ), 111.9 (gallagyl-C-6 $\alpha$ ), 114.6, 114.7, 115.2, 115.3, 115.8, 115.9, 118.3, 118.6, 122.7, 122.8, 123.5, 123.8, 125.2, 125.3, 125.6, 125.7, 137.0, 137.0, 137.1, 137.2, 137.5, 137.6, 138.7, 138.7, 139.9, 139.9, 141.0, 141.2, 144.4, 144.4, 144.9, 144.9, 146.0, 146.0, 146.1, 146.3, 148.4, 148.6, 148.7, 148.8, 160.2 (lactone carbonyl-C), 160.3 (lactone carbonyl-C), 160.4 (lactone carbonyl-C), 160.5 (lactone carbonyl-C), 169.7 (ester carbonyl-C-6 $\beta$ ), 169.9 (ester carbonyl-C-6 $\alpha$ ), 171.4 (ester carbonyl-C-4 $\alpha$ ), 171.4 (ester carbonyl-C-4 $\beta$ ); HRESIMS:  $m/z$  781.0566 [M–H]<sup>–</sup> (calcd for C $_{34}$ H $_{21}$ O $_{22}$ , 781.0530).

Punicalagin (**19**) (1 $\alpha$ :1 $\beta$   $\approx$  1:1): pale yellow powder; CD ( $c$  0.00010 M, MeOH) mdeg ( $\lambda$ nm): +4.56 (240), –0.19 (257), +5.55 (275), +0.06 (301), +2.14 (329), –5.14 (381);  $^1\text{H}$ -NMR (Acetone- $d_6$ :D $_2$ O, 9:1, 400 MHz):  $\delta$  5.12 (1H, d,  $J$  = 3.2 Hz, Glc-H-1 $\alpha$ ), 4.81 (1H, dd,  $J$  = 3.2, 9.6 Hz, Glc-H-2 $\alpha$ ), 5.23 (1H, dd,  $J$  = 9.6, 9.6 Hz, Glc-H-3 $\alpha$ ), 4.82 (1H, dd,  $J$  = 9.6, 9.6 Hz, Glc-H-4 $\alpha$ ), 3.27 (1H, m, Glc-H-5 $\alpha$ ), [2.17 (1H, br. d,  $ca.$   $J$  = 11 Hz), 4.07 (1H, br. d,  $ca.$   $J$  = 11 Hz), Glc-H-6 $\alpha$ ], 6.57 (1H, s, HHDP-H-2 $\alpha$ ), 6.66 (1H, s, HHDP-H-3 $\alpha$ ), 6.73 (1H, s, gallagyl-H-4 $\alpha$ ), 7.01 (1H, s, gallagyl-H-6 $\alpha$ ); 4.68 (1H, d,  $J$  = 10.8 Hz, Glc-H-1 $\beta$ ), 4.69 (1H, dd,  $J$  = 9.6, 10.8 Hz, Glc-H-2 $\beta$ ), 4.92 (1H, dd,  $J$  = 9.6, 9.6 Hz, Glc-H-3 $\beta$ ), 4.84 (1H, dd,  $J$  = 9.6, 9.6 Hz,

Glc-H-4 $\beta$ ), 2.66 (1H, m, Glc-H-5 $\beta$ ), [2.24 (1H, br. d, ca.  $J$  = 11 Hz), 4.12 (1H, br. d, ca.  $J$  = 11 Hz), Glc-H-2-6 $\beta$ ], 6.58 (1H, s, HHDP-H-2 $\beta$ ), 6.66 (1H, s, HHDP-H-3 $\beta$ ), 6.80 (1H, s, gallagyl-H-4 $\beta$ ), 7.02 (1H, s, gallagyl-H-6 $\beta$ );  $^{13}\text{C}$  NMR (Acetone- $d_6$ :D $_2$ O, 9:1, 100 MHz):  $\delta$  90.0 (Glc-C-1 $\alpha$ ), 74.4 (Glc-C-2 $\alpha$ ), 76.8 (Glc-C-3 $\alpha$ ), 71.0 (Glc-C-4 $\alpha$ ), 66.6 (Glc-C-5 $\alpha$ ), 64.4 (Glc-C-6 $\alpha$ ); 94.3 (Glc-C-1 $\beta$ ), 76.7 (Glc-C-2 $\beta$ ), 79.1 (Glc-C-3 $\beta$ ), 70.8 (Glc-C-4 $\beta$ ), 72.6 (Glc-C-5 $\beta$ ), 64.3 (Glc-C-6 $\beta$ ); HHDP and gallagyl parts:  $\delta$  107.3 (HHDP-C-2 $\beta$ ), 107.5 (2C, HHDP-C-2 $\alpha$ , 3 $\beta$ ), 107.6 (HHDP-C-3 $\alpha$ ), 109.4 (gallagyl-C-4 $\alpha$ ), 109.9 (gallagyl-C-4 $\beta$ ), 110.2, 110.3, 111.7 (gallagyl-C-6 $\alpha$ ), 111.8 (gallagyl-C-6 $\beta$ ), 114.0, 114.1, 114.6, 114.6, 114.9, 115.0, 115.2, 115.3, 118.0, 118.2, 122.0, 122.0, 123.4, 123.6, 124.5, 124.7, 124.9, 125.1, 126.0, 126.3 (2C), 126.4, 136.3 (2C), 136.5, 136.6 (2C), 136.9, 136.9, 137.2, 137.9, 138.0, 138.9, 139.0, 140.1, 140.6, 144.0, 144.1, 144.3, 144.4, 144.4, 144.4, 144.7, 144.7, 145.1, 145.2, 145.2, 145.2, 145.3, 145.4, 145.4, 145.5, 145.7, 145.7, 147.8, 147.9, 148.2, 148.4, 158.8 (lactone carbonyl-C), 158.8 (lactone carbonyl-C), 159.2 (lactone carbonyl-C), 159.3 (lactone carbonyl-C), 168.6 (ester carbonyl-C-6 $\beta$ ), 168.8 (ester carbonyl-C-6 $\alpha$ ), 168.9 (ester carbonyl-C-3 $\beta$ ), 169.0 (ester carbonyl-C-3 $\alpha$ ), 169.1 (ester carbonyl-C-2 $\beta$ ), 169.4 (ester carbonyl-C-2 $\alpha$ ), 169.7 (ester carbonyl-C-4 $\beta$ ), 170.0 (ester carbonyl-C-4 $\alpha$ ); HRESIMS:  $m/z$  1083.0555 [M-H] $^-$  (calcd for C $_{48}$ H $_{27}$ O $_{30}$ , 1083.0593).

Punicacortein C (**20**): pale yellow powder; CD ( $c$  0.00010 M, MeOH) mdeg ( $\lambda$ nm): -1.76 (234), +3.58 (272), +0.23 (301), +1.48 (328), -2.42 (379);  $[\alpha]_D^{25}$  -40.4 ( $c$  0.58, MeOH).  $^1\text{H}$  NMR (CD $_3$ OD, 400 MHz):  $\delta$  5.34 (1H, d,  $J$  = 4.8 Hz, Glc-H-1), 4.87 (1H, dd,  $J$  = 2.0, 4.8 Hz, Glc-H-2), 5.07 (1H, dd,  $J$  = 2.0, 5.2 Hz, Glc-H-3), 4.22 (1H, dd,  $J$  = 1.2, 5.2 Hz, Glc-H-4), 2.26 (1H, dd,  $J$  = 1.2, 10.0 Hz, Glc-H-5), [3.64 (1H, d,  $J$  = 10.0 Hz), 3.83 (1H, dd,  $J$  = 10.0, 10.0 Hz), Glc-H-2-6], 6.29 (1H, s, HHDP-H-3), 6.70 (1H, s, gallagyl-H-4), 7.26 (1H, s, gallagyl-H-6);  $^{13}\text{C}$  NMR (CD $_3$ OD, 100 MHz):  $\delta$  68.7 (Glc-C-1), 75.3 (Glc-C-2), 68.2 (Glc-C-3), 74.2 (Glc-C-4), 73.2 (Glc-C-5), 68.5 (Glc-C-6); HHDP and gallagyl parts: 105.0 (HHDP-C-3), 109.5 (gallagyl-C-4), 110.5, 113.0 (gallagyl-C-6), 115.1, 115.7, 116.2, 116.5, 116.9, 119.0, 120.2, 120.5, 123.0, 125.0, 125.2, 127.2, 135.8, 137.2, 137.4, 138.6, 139.5, 139.6, 140.8, 140.9, 144.6, 144.7, 144.8, 145.3, 145.8, 146.2, 146.5, 146.9, 147.7, 148.6, 160.4 (lactone carbonyl-C), 161.4 (lactone carbonyl-C), 167.5 (ester carbonyl-C-2), 168.9 (ester carbonyl-C-6), 169.6 (ester carbonyl-C-4), 170.0 (ester carbonyl-C-3); HRESIMS:  $m/z$  1083.0636 [M-H] $^-$  (calcd for C $_{48}$ H $_{27}$ O $_{30}$ , 1083.0593).
